# Supplementary material for: Chromosome-level genome and population genomics reveal evolutionary characteristics and conservation status of Chinese indigenous geese
Source: PubMed Central journal article supplement (PMC9640629; doi:10.1038/s42003-022-04125-x), 2022-11-07
Supplement: 42003_2022_4125_MOESM2_ESM.pdf [file 42003_2022_4125_MOESM2_ESM.pdf]

# 1 Chromosome-level genome and population genomics reveal 2 evolutionary characteristics and conservation status of Chinese 3 indigenous geese

4 Jing Ouyang<sup>1†</sup>, Sumei Zheng<sup>1,2†</sup>, Min Huang<sup>2</sup>, Hongbo Tang<sup>1</sup>, Xiaohui Qiu<sup>3</sup>, Shoujin  
5 Chen<sup>4</sup>, Zhangzhang Wang<sup>4</sup>, Zhongdong Zhou<sup>4</sup>, Yuren Gao<sup>1</sup>, Yanpeng Xiong<sup>1</sup>, Guohua  
6 Zeng<sup>3</sup>, Jimin Huang<sup>3</sup>, Jiugen He<sup>3</sup>, Jun Ren<sup>2</sup>, Hao Chen<sup>1\*</sup>, Xueming Yan<sup>1\*</sup>

## 8 Supplementary Methods

### 9 Supplementary Method 1. Genome assembly

#### 10 Stage 1: PacBio assembly

11 Genomic DNA was isolated from a female Xingguo gray goose (XGG) through a traditional  
12 phenol-chloroform protocol, the qualified genomic DNA was fragmented by 26 G Needle,  
13 and then PacBio SMRTbell libraries (20 Kb insert) were prepared for single-molecule real-  
14 time sequencing with a sequencing depth of 101.33× and raw data was 123.62 Gb  
15 (Supplementary **Figure 1** and Supplementary Table 1).

16 Using wtdbg v2.4<sup>1</sup> for *de novo* assembly based on the data generated by PacBio  
17 sequencing above, the assembly process was as follows:

18 (1) Alignment: KBM (Kmer-Bin-Mapping) algorithm was used to cut the sequenced long  
19 reads into several bins with 256-bp as a unit without overlapping. The k-mers in the fragment  
20 were then classified into a bin, and a k-mer has at least  $4 \times 256$ -bp. If most k-mers in a bin  
21 occur at a higher frequency, the bin will be filtered out as a high repeat bin. Finally, the linear  
22 relationship between matched bins in the sequence was searched by dynamic programming.

23 (2) Assembly: FBG (Fuzzy Bruijn Graph) was used to break reads into multiple 1024-bp  
24 k-mers as vertices in FBG graph, and then these points were connected to form FBG graph  
25 according to the reading path, and contigs were obtained by simplifying FBG graph.

26 (3) Polish: To improve the assembly quality, the reads generated by PacBio sequencing

27 were used to polish the assembled contigs. The high-confidence bases were obtained by  
28 comparing and correcting each other between sequences, and finally high-quality  
29 consensus sequences were produced.

### 30 **Stage 2: Super-scaffolding**

31 10× Genomics is based on GemCode platform to amplify the long fragment sequence,  
32 introduces barcode sequence and adapter primers, then break the sequences into  
33 appropriate fragments for sequencing, and assemble multiple reads through barcode  
34 sequence information to obtain 99.10× Linked-reads data (120.90 Gb; Supplementary  
35 Figure 1 and Supplementary Table 1).

36 The Linked-reads generated by the 10× Genomics were assembled with the consensus  
37 sequences of Stage 1 using fragScaff v140324.1<sup>2</sup> to generate the super-scaffold, and the  
38 final 10× Genomics assembly version was obtained.

### 39 **Stage 3: Super-scaffold gap filling**

40 To improve the assembly of complex regions of the genome, we constructed the BioNano  
41 library for high-depth sequencing (137.47×, 167.72 Gb) using the Irys system, and used the  
42 obtained physical map to span repetitive fragments and some regions containing complex  
43 elements to acquire highly continuous Super-scaffold (Supplementary Table 1).

44 The process of BioNano assisted genome assembly was as follows:

45 (1) The assembled version of Stage 2 was electronically digested and converted into a  
46 cmap file, which was recorded as NGS cmap.

47 (2) Enzyme site spacing was normalized by bionano data bnx, NGS map and estimated  
48 genome size, and the optimal assembly parameters were screened out. BioNano data were  
49 assembled to generate a BioNano assembly version, which was recorded as BNG cmap.

50 (3) The bnx, NGS map, BNG map and initial assembly version were based on  
51 hybridScaffold software<sup>3</sup>, and reasonable parameters were set to obtain the final assembly  
52 version of BioNano.

### 53 **Stage 4: Assembly polishing using Illumina reads**

54 In addition, we sequenced by constructing a 350-bp insert library based on a standardized  
55 process of Illumina NOVASEQ 6000 platform with a sequencing depth of 111.59×, resulting

56 in a total of 136.14 Gb of data (Supplementary Table 1). Using Illumina pair-end reads to  
57 polish the assembled version of Stage 3 and the specific process was as follows:

58 (1) The reads generated by Illumina sequencing were aligned to the assembled version  
59 of Stage 3 by BWA v0.7.17<sup>4</sup>, and the Sequence Alignment/Map format (BAM) files were  
60 obtained and sorted.

61 (2) Subsequently, combined with the mapping results, the assembled version was  
62 polished iteratively 2 to 3 times to improve the single-base correct rate using Pilon v1.23<sup>5</sup>.

### 63 **Stage 5: Hi-C aided chromosome-level whole-genome assembly**

64 Hi-C technology obtains the interaction information of spatially connected DNA fragments  
65 through special experimental techniques. Different contigs or scaffolds are classified into  
66 different chromosomes according to the probability of internal chromosome interaction  
67 significantly higher than that between chromosomes. Contigs or scaffolds of the same  
68 chromosome are ordered and orientated according to the probability which decreases with  
69 the increase of the interaction distance. To anchor assembled scaffolds onto the  
70 chromosome, we constructed the Hi-C library and obtained sequencing data (112.91×,  
71 137.75 Gb) via the Illumina HiSeq X Ten platform. The detailed auxiliary anchoring process  
72 was as follows:

73 (1) Alignment: Hi-C data were aligned to the assembled scaffolds constructed by Stage 4  
74 through BWA, and duplicated and non-aligned data were removed by SAMtools v1.10<sup>6</sup> to  
75 obtain high-quality alignment data while extracting reads near the restriction site for auxiliary  
76 assembly.

77 (2) Clustering: Through the physical coverage information of the comparison results, the  
78 incorrect assembly from the previous step was interrupted and corrected. If read pairs  
79 captured by Hi-C technology on two contigs, it is determined that there is an interaction  
80 between the two contigs. The greater the number of interacting reads on two contigs, the  
81 stronger the interaction, and the more they tend to cluster together. Subsequently, we  
82 counted the number of interactions between contigs to cluster the contigs and divided them  
83 into designated classes according to the number of chromosomes of the species.

84 (3) Sorting and orientation: According to the results of clustering, the position of each two  
85 contigs and the intensity of interaction, LACHESIS v201701<sup>7</sup>

86 (<https://github.com/shendurelab/LACHESIS>) was used to sort and orientate the assembled  
87 sequences to the chromosome level.

88 Finally, we performed artificial correction of the LACHESIS-assembled results and gap  
89 filling or sequence de-duplication to increase the accuracy and completeness of the  
90 assembled genome.

## 91 **Assembly quality assessment**

### 92 (1) Sequence consistency assessment

93 To evaluate the accuracy of genome assembly, we used BWA to re-align the Illumina pair-  
94 end reads to the assembled genome of XGG and counted the mapping rate, the coverage  
95 and sequencing depth of the genome to assess consistency of assembly and the  
96 homogeneity of sequencing. The alignment rate was about 99.19%, and the coverage rate  
97 was about 97.96%, indicating that the reads and the assembled genome had a good  
98 consistency (Supplementary Table 6). The heterozygous SNP ratio of XGG was 0.2777%  
99 and the homozygous SNP ratio was 0.0005%, which generally reflected the accuracy of  
100 genome assembly. This result indicated that the XGG genome had a higher single-base  
101 accuracy.

### 102 (2) Sequence integrity assessment

103 To further investigate the quality of the genome assembly, the assembled transcriptome  
104 Unigenes were mapped to the genome sequences and performed CEGMA v2.5<sup>8</sup> (Core  
105 Eukaryotic Genes Mapping Approach: <http://korflab.ucdavis.eGO/dataseda/cegma/>) and  
106 BUSCO v.5.2.2<sup>9</sup> (Benchmarking Universal Single-Copy Orthologs: <http://busco.ezlab.org/>)  
107 assessments. CEGMA assessment was to select conserved genes (248 genes) in 6  
108 eukaryotic model organisms to form the core gene library, and combined with tblastn<sup>10</sup> and  
109 GeneWise<sup>11</sup> to evaluate the completeness of assembled genome. BUSCO assessment  
110 based on metaeuk v5.34<sup>12</sup> and hmmer v3.1<sup>13</sup> to assess the integrity of XGG genome  
111 assembly of 8,338 orthologous single-copy genes in the Aves database. Results showed  
112 that over 92.3% of 248 core genes could be covered by the genome indicating its  
113 completeness. BUSCO results also indicated that more than 95.7% of 8,338 avian  
114 orthologous genes could be found in the XGG genome, also reflecting its high quality  
115 (Supplementary Table 7).

## 116 **Supplementary Method 2. Genome annotation**

### 117 **Stage 1: Repeat annotation**

118 We used homologous alignment and *de novo* search to annotate whole-genome repeat  
119 sequences of XGG in our repeat annotation pipeline (Supplementary Figure 3). Tandem  
120 Repeat was extracted using Tandem Repeats Finder (TRF) v4.09<sup>14</sup>  
121 (<http://tandem.bu.edu/trf/trf.html>) by *ab initio* prediction. Based on the repeat sequence  
122 database RepBase<sup>15</sup> (<http://www.girinst.org/repbase/>), we used RepeatMasker v4.0.7<sup>16</sup>  
123 (<http://www.repeatmasker.org/>) software and its in-house scripts (RepeatProteinMask) with  
124 default parameters to identify and classify sequences similar to known repetitive sequences.  
125 And *ab initio* prediction built *de novo* repetitive elements database by LTR\_FINDER v1.05<sup>17</sup>  
126 ([http://tlife.fudan.edu.cn/ltr\\_finder/](http://tlife.fudan.edu.cn/ltr_finder/)), RepeatScout v1.05<sup>18</sup> (<http://www.repeatmasker.org/>),  
127 RepeatModeler v1.0.3<sup>19</sup> (<http://www.repeatmasker.org/RepeatModeler.html>) with default  
128 parameters, then all repeat sequences with lengths >100bp and gap 'N' less than 5%  
129 constituted the raw transposable element (TE) library. A custom library (a combination of  
130 Repbase and our *de novo* TE library which was processed by uclust v1.2.22q<sup>20</sup> to yield a  
131 non-redundant library) was supplied to RepeatMasker for DNA-level repeat identification.  
132 Finally, we obtained 2.04% tandem repeats by TRF, 8.55% transposable elements by  
133 RepeatMasker and 4.55% transposable element proteins by RepeatProteinMask, and totally  
134 of 10.17% non-redundant repetitive sequences. Additionally, we annotated 0.16% DNA  
135 transposable elements, 6.26% LINE, 0.03% SINE and 2.54% LTR (Supplementary Tables  
136 10–11).

### 137 **Stage 2: Gene annotation**

#### 138 (1) Gene structure annotation

139 Structural annotation of XGG genome incorporates homology-based prediction, *de novo*  
140 prediction, and transcriptome data-based approach. First, the homology prediction was  
141 performed, using coding sequences of the homologous species (*Anas platyrhynchos*, *Anser*  
142 *cygnoides*, *Gallus gallus*, *Meleagris gallopavo*, and *Coturnix japonica*) to compare with the  
143 genome sequence of XGG through BLAST v2.28<sup>10</sup> (<http://blast.ncbi.nlm.nih.gov/Blast.cgi>),  
144 and then the matching proteins were aligned to the homologous genome sequences for

145 accurate spliced alignments with GeneWise v2.4.1<sup>21</sup> (<http://www.ebi.ac.uk/~birney/wise2/>)  
146 software which was used to predict gene structure contained in each protein region.  
147 Afterward, we conducted *de novo* prediction and used Augustus v3.3.3<sup>22</sup> ([http://bioinf.uni-](http://bioinf.uni-greifswald.de/augustus/)  
148 [greifswald.de/augustus/](http://bioinf.uni-greifswald.de/augustus/)), Geneid v1.4<sup>23</sup>, Genescan v3.1.2<sup>24</sup>, GlimmerHMM v3.04<sup>25</sup>  
149 (<http://ccb.jhu.edu/software/glimmerhmm/>) and SNAP v2013.11.29<sup>26</sup>  
150 (<http://homepage.mac.com/iankorf/>) to predict gene structure based on the statistical  
151 characteristics of Xingguo gray goose genome sequence data. To optimize the genome  
152 annotation, the transcriptome reads from different tissues that were aligned to XGG genome  
153 using TopHat v2.0.8<sup>27</sup> with default parameters to identify exons region and splice positions.  
154 The alignment results were then used as input for Cufflinks v2.1.1<sup>28</sup> with default parameters  
155 for genome-based transcript assembly. Furthermore, combining the genes supported by  
156 various methods through EvidenceModeler (EVM) v1.1.1<sup>29</sup>  
157 (<http://evidencemodeler.sourceforge.net/>) to generate a non-redundant and more complete  
158 gene set. In the end, using PASA v2.4.1<sup>29</sup> (<http://pasa.sourceforge.net/>) to correct the EVM  
159 annotation results, add UTR and variable shear, and other information to get the final gene  
160 set.

## 161 (2) Gene function annotation

162 After acquiring gene structure information, we further utilized Blastp v2.28<sup>30</sup> (E-value <  
163 1e-5) to compare the sequences with protein databases such as SwissProt<sup>31</sup>  
164 (<http://www.uniprot.org/>), NCBI nr<sup>32</sup> (<http://www.ncbi.nlm.nih.gov/protein/>), Pfam<sup>33</sup>  
165 (<http://pfam.xfam.org/>), KEGG<sup>34</sup> (<http://www.genome.jp/kegg/>) and InterPro<sup>35</sup>  
166 (<https://www.ebi.ac.uk/interpro/>) to predict the domain, the functions of encoding proteins of  
167 new genes, and the metabolic pathway and signal transduction pathway. Ultimately, we  
168 totally annotated 17,135 (98.2%) functional genes of 17,448 predicted genes, of which  
169 16,381 (93.9%) genes from Swissprot database, 16,803 (96.3%) genes from NCBI nr  
170 database, 14,631 (83.9%) genes from KEGG database, 17,072 (97.8%) genes from InterPro  
171 database, 15,926 (91.3%) genes from GO<sup>36</sup> and 14,435 (82.7%) genes from Pfam database  
172 (Supplementary Figure 4 and Supplementary Table 9).

## 173 **Stage 3: Annotation of ncRNAs**

174 Annotations of noncoding RNAs include tRNAs, rRNAs, miRNAs, and snRNAs. The

175 tRNAscan-SE v1.4<sup>37</sup> (<http://lowelab.ucsc.edu/tRNAscan-SE/>) was used to identify the tRNA  
176 sequences in terms of the structural characteristics. According to the high conservation of  
177 rRNA, we used the rRNA sequences of the related species as reference to predict by BLAST.  
178 Moreover, the INFERNAL v1.1.2<sup>38</sup> (<http://infernal.janelia.org/>) in Rfam<sup>39</sup> was used to predict  
179 the sequence information of miRNA and snRNA on the genome through the covariance  
180 model of the Rfam family (Supplementary Table 12).

### 181 **Supplementary Method 3. Identification of sex chromosomes**

182 The sex chromosomes of XGG were determined based on the genomic sequence of avian  
183 chromosome-level genomes in the public database, which mainly encompasses four steps:  
184 segmentation of genomic sequence, homologous analysis of sequences, sequence-based  
185 screening and assessment. The specific process was as follows:

#### 186 **Step 1: Segmentation of genomic sequence**

187 Firstly, we split sequences of XGG into short-reads with a size of 300 bp using in-house  
188 python script, and then filtered the reads with more than 10 ambiguous bases N. The  
189 remaining reads were used for subsequent alignment.

#### 190 **Step 2: Homologous analysis of sequences**

191 We simultaneously downloaded the assembled sequences of 7 birds whose sex  
192 chromosomes have been identified (Supplementary Table 13). Then, we separately merged  
193 all Z and W sequences as the Z and W reference library and built the index files for each of  
194 them using BWA. The short-reads (300 bp) of XGG that split and filtered above were then  
195 mapped to the reference libraries and all the aligned reads were extracted by SAMtools.

#### 196 **Step 3: Sequence-based screening**

197 Subsequently, we further carried out quality control on the aligned reads extracted above.  
198 We kept the reads with Mapping Quality > 30 by SAMtools and sorted the alignments  
199 according to scaffolds and read ID. Afterward, we filtered the alignments that were mapped  
200 on different sequences or different regions in one scaffold. Finally, the chromosome type of  
201 the scaffolds was inferred according to the proportion of aligned reads to the scaffold and

202 then calculated the cumulative length of the same chromosome type of scaffolds until the  
203 average length of the downloaded high-quality Z and W references.

#### 204 **Step 4: Sex chromosome assessment**

205 Due to the close relationship between goose and duck, and considering the high assembly  
206 quality of Pekin duck, XGG and Pekin duck<sup>40</sup> were selected for collinearity analysis. We  
207 used the “One Step MCScanX-Super Fast” function of TBtools v1.06<sup>41</sup> to align the genome  
208 sequences of Pekin duck and XGG, merged the results of MCScanX to generate a  
209 collinearity file, and then visualized through the “File Transformat for MicroSynteny Viewer”  
210 function to further evaluate the sex-linked sequences. Next, with the re-sequenced mapping  
211 data of 162 Chinese domestic geese (Supplementary Table 15), the average sequencing  
212 depth of all sequences was computed using the ‘samtools depth’ command of SAMtools in  
213 5-kb non-overlapping windows. We regarded the sequencing depth of autosomes as a  
214 normal value. The sequencing depths of Z and W chromosomes in females were  
215 approximately identical, and both were half of the autosomes. The average sequencing  
216 depth of Z chromosome in males was similar to that of autosomes, while the W chromosome  
217 was closer to zero. Based on the above identification results, we focused on Hic\_3 and  
218 Hic\_4 as Z and W chromosomes of XGG, respectively.

#### 219 **Supplementary Method 4. SNP calling**

220 To improve the efficiency and accuracy of variants detection, we used the commercial  
221 software Sentieon v201711.03<sup>42</sup> on Tianhe-2 Supercomputer to identify SNPs and small  
222 indels for 994 geese. First, we built the index file for XGG and aligned high-quality reads to  
223 the reference with BWA to generate Sequence Alignment/Map (SAM) files, which were then  
224 format transformed to BAM files and sorted by SAMtools. For the mapping results,  
225 “LocusCollector” and “Realigner” functions from Sentieon were used to delete polymerase  
226 chain reaction (PCR) duplicates and calibrated according to the quality score. Next,  
227 “Haplotype” function was applied to generate Genomic Variant Call Format (GVCF) files for  
228 each individual and separately performed joint calling for 772 XGG and 222 geese using  
229 “GVCFtyper” function. Finally, GATK v4.0.12<sup>43</sup>、BCFtools v1.15<sup>44</sup> and PLINK v1.9<sup>45</sup> were



230 used to filter SNPs with the following conditions:

231 (1) For 772 low-depth (1×) resequencing individuals: we call variants for 2 steps. For the  
232 first step, we retained SNPs with the parameters “QD (QualByDepth) < 2.0, FS  
233 (FisherStrand) > 60.0, MQ (RMSMappingQuality) < 40.0, SOR (StrandOddsRatio) > 3.0,  
234 MQRankSum (MappingQualityRankSumTest) < -12.5, ReadPosRankSum  
235 (ReadPosRankSumTest) < -8.0, SOR (StrandOddsRatio) > 3.0, MAF (Minor Allele  
236 Frequency) > 0.003, and call rate > 0.8”. Secondly, we used SNPs obtained from the first  
237 step as a known data set to perform joint calling again. After filtering with the same conditions  
238 above, 163,067 SNPs were obtained to carry out whole genome imputation using STITCH  
239 v1.68<sup>46</sup> with the parameters of K = 40 and nGen = 50. Finally, a total of 12,415,004 SNPs  
240 was retained with MAF > 0.01 and call rate > 0.9.

241 (2) For 222 high-depth (10×) resequencing individuals: after joint calling, 13,008,900  
242 SNPs were obtained after quality control with the parameters “QD < 2.0, FS > 60.0, MQ <  
243 40.0, SOR > 3.0, MQRankSum < -12.5, ReadPosRankSum < -8.0, SOR>3.0, MAF > 0.05,  
244 and call rate > 0.9”.

## 245 **Supplementary Tables**

246 **Supplementary Table 1.** Statistics of genome sequencing data of XGG.

| <b>Pair-end libraries</b> | <b>Insert size (bp)</b> | <b>Total data (Gb)</b> | <b>Read length (bp)</b> | <b>Sequence coverage (×)</b> |
|---------------------------|-------------------------|------------------------|-------------------------|------------------------------|
| Illumina reads            | 350                     | 136.14                 | 150                     | 111.59                       |
| PacBio reads              | 20,000                  | 123.62                 | 15,280 (N50)            | 101.33                       |
| 10× Genomics              | 600                     | 120.90                 | 150                     | 99.10                        |
| Bionano                   | -                       | 167.71                 | -                       | 137.47                       |
| Hi-C                      | 350                     | 137.75                 | 150                     | 112.91                       |
| Total                     | -                       | 686.12                 | -                       | 562.4                        |

247

248 **Supplementary Table 2.** Statistical results for each chromosome on XGG genome.

| Hic_ID   | Pseudo-chromosome | Cluster number | length (bp) | G+C (%) |
|----------|-------------------|----------------|-------------|---------|
| Hic_0    | 1                 | 7              | 209,937,520 | 40.16   |
| Hic_1    | 2                 | 7              | 161,260,155 | 40.04   |
| Hic_2    | 3                 | 5              | 121,836,162 | 39.94   |
| Hic_3    | 38 (Z)            | 8              | 78,059,545  | 39.64   |
| Hic_4    | 4 (W)             | 5              | 18,190,528  | 45.29   |
| Hic_5    | 5                 | 4              | 77,964,326  | 39.83   |
| Hic_6    | 6                 | 2              | 65,887,397  | 41.49   |
| Hic_7    | 7                 | 2              | 40,772,850  | 41.41   |
| Hic_8    | 8                 | 2              | 38,093,052  | 41.88   |
| Hic_9    | 9                 | 2              | 32,954,318  | 42.25   |
| Hic_10   | 10                | 3              | 26,882,679  | 43.10   |
| Hic_11   | 11                | 2              | 20,182,763  | 44.98   |
| Hic_12   | 12                | 2              | 22,278,886  | 43.40   |
| Hic_13   | 13                | 2              | 22,003,932  | 42.55   |
| Hic_14   | 14                | 2              | 22,645,356  | 43.25   |
| Hic_15   | 15                | 2              | 21,569,393  | 43.09   |
| Hic_16   | 16                | 3              | 18,393,121  | 45.26   |
| Hic_17   | 17                | 2              | 16,340,960  | 46.30   |
| Hic_18   | 18                | 3              | 15,607,799  | 45.79   |
| Hic_19   | 19                | 2              | 13,056,453  | 47.62   |
| Hic_20   | 20                | 17             | 12,304,091  | 48.79   |
| Hic_21   | 21                | 25             | 12,166,798  | 47.25   |
| Hic_22   | 22                | 2              | 9,065,161   | 48.44   |
| Hic_23   | 23                | 2              | 7,873,851   | 49.76   |
| Hic_24   | 24                | 2              | 7,713,126   | 51.44   |
| Hic_25   | 25                | 2              | 7,064,174   | 52.59   |
| Hic_26   | 26                | 2              | 6,484,800   | 52.70   |
| Hic_27   | 27                | 3              | 5,512,697   | 49.52   |
| Hic_28   | 28                | 2              | 6,110,239   | 53.50   |
| Hic_29   | 29                | 2              | 3,196,551   | 59.17   |
| Hic_30   | 30                | 2              | 2,953,559   | 59.97   |
| Hic_31   | 39                | 2              | 1,382,414   | 62.90   |
| Hic_32   | 31                | 2              | 1,172,193   | 56.62   |
| Hic_33   | 32                | 4              | 1,164,976   | 60.47   |
| Hic_34   | 33                | 2              | 780,505     | 62.98   |
| Hic_35   | 34                | 46             | 638,055     | 58.32   |
| Hic_36   | 35                | 5              | 931,379     | 63.66   |
| Hic_37   | 36                | 17             | 1,369,031   | 57.16   |
| Hic_38   | 37                | 15             | 4,330,114   | 51.62   |
| Scaffold | -                 | 2,203          | 27,335,139  | -       |

\*

250 **Supplementary Table 3.** The assembly rate of XGG.

|                                      |               |
|--------------------------------------|---------------|
| <b>Number of anchored bases (bp)</b> | 1,136,130,909 |
| <b>Total number of bases (bp)</b>    | 1,163,486,048 |
| <b>Anchored Rate (%)</b>             | 97.65         |

251  
252  
253  
254

**Supplementary Table 4.** Nucleotide content of XGG.

| <b>Type</b> | <b>Number (bp)</b> | <b>% of genome</b> |
|-------------|--------------------|--------------------|
| A           | 334,957,286        | 28.79%             |
| T           | 335,072,751        | 28.80%             |
| C           | 244,919,141        | 21.05%             |
| G           | 244,557,032        | 21.02%             |
| N           | 3,979,838          | 0.34%              |

255  
256  
257  
258

**Supplementary Table 5.** Genome assemblies for scaffold N50 length comparison and BUSCO analyses.

| <b>Common name</b>  | <b>Species</b>                                  | <b>Assembly level</b> | <b>Assembly version</b> |
|---------------------|-------------------------------------------------|-----------------------|-------------------------|
| Xingguo gray goose  | <i>Anser cygnoides</i>                          | Chromosome            | This study              |
| Tianfu goose        | <i>Anser cygnoides</i> <sup>47</sup>            | Chromosome            | GCA_013030995.1         |
| Zhedong white goose | <i>Anser cygnoides</i> <sup>48</sup>            | Scaffold              | GCF_000971095.1         |
| Sichuan white goose | <i>Anser cygnoides</i> <sup>49</sup>            | Scaffold              | GCA_002166845.1         |
| Bar-headed goose    | <i>Anser indicus</i> <sup>50</sup>              | Chromosome            | GCA_006229135.1         |
| Pink-footed goose   | <i>Anser brachyrhynchus</i> <sup>51</sup>       | Chromosome            | GCA_002592135.1         |
| African pygmy goose | <i>Nettapus auritus</i>                         | Chromosome            | GCA_011076525.1         |
| Canada goose        | <i>Branta canadensis</i>                        | Chromosome            | GCA_006130075.1         |
| Chicken             | <i>Gallus gallus</i> <sup>52</sup>              | Chromosome            | GCA_000002315.5         |
| Turkey              | <i>Meleagris gallopavo</i> <sup>53</sup>        | Chromosome            | GCF_000146605.3         |
| Peregrine falcon    | <i>Peregrine falcon</i> <sup>54</sup>           | Chromosome            | GCA_001887755.1         |
| Bengalese finch     | <i>Lonchura striata domestica</i> <sup>55</sup> | Chromosome            | GCA_005870125.1         |
| Pekin duck          | <i>Anas platyrhynchos</i> <sup>40</sup>         | Chromosome            | GCA_003850225.1         |
| Zebra finch         | <i>Taeniopygia guttata</i> <sup>54</sup>        | Chromosome            | GCA_009859065.2         |
| Kakapo              | <i>Strigops habroptila</i> <sup>56</sup>        | Chromosome            | GCA_004027225.2         |
| Superb fairywren    | <i>Malurus cyaneus</i> <sup>57</sup>            | Chromosome            | GCA_009741485.1         |

259  
260  
261

262 **Supplementary Table 6.** Reads coverage of XGG.

|               |                           |        |
|---------------|---------------------------|--------|
| Reads         | Mapping rate (%)          | 99.19  |
|               | Average sequencing depth  | 100.88 |
|               | Coverage (%)              | 97.96  |
| <b>Genome</b> | Coverage at least 4× (%)  | 97.87  |
|               | Coverage at least 10× (%) | 97.76  |
|               | Coverage at least 20× (%) | 97.56  |

263 Note: Coverage at least N×(%), the proportion of the genome covered with N× Reads.

264

265

266 **Supplementary Table 7.** The results of assembly quality assessment of CEGMA and  
267 BUSCO.

| <b>CEGMA</b> |                    | <b>BUSCO</b> |            |         |
|--------------|--------------------|--------------|------------|---------|
| complete     | complete + partial | Complete     | Fragmented | Missing |
| 171 (68.95%) | 230 (92.30%)       | 95.70%       | 1.0%       | 3.30%   |

268

| Method                  | Gene set                   | Gene number | Mean transcript length (bp) | Mean CDS length (bp) | Exons per transcript | Mean exon length (bp) | Mean intron length (bp) |
|-------------------------|----------------------------|-------------|-----------------------------|----------------------|----------------------|-----------------------|-------------------------|
| <b>De novo</b>          | Augustus <sup>22</sup>     | 20,204      | 14,520.68                   | 1,313.99             | 7.75                 | 169.54                | 1,956.45                |
|                         | GlimmerHMM <sup>25</sup>   | 211,371     | 4,751.23                    | 480.92               | 2.69                 | 178.52                | 2,520.96                |
|                         | SNAP <sup>58</sup>         | 66,746      | 25,705.76                   | 663.00               | 5.52                 | 120.04                | 5,536.67                |
|                         | Geneid <sup>23</sup>       | 35,320      | 22,781.80                   | 1,148.26             | 6.11                 | 187.86                | 4,231.63                |
|                         | Genscan <sup>24</sup>      | 43,982      | 19,943.00                   | 1,368.08             | 7.97                 | 171.71                | 2,666.07                |
| <b>Homolog</b>          | <i>Anser cygnoides</i>     | 33,702      | 9,941.82                    | 959.90               | 4.96                 | 193.37                | 2,265.80                |
|                         | <i>Anas platyrhynchos</i>  | 21,983      | 15,062.37                   | 1,263.90             | 6.67                 | 189.36                | 2,431.61                |
|                         | <i>Coturnix japonica</i>   | 19,020      | 17,262.92                   | 1,405.10             | 7.64                 | 183.90                | 2,388.01                |
|                         | <i>Gallus gallus</i>       | 24,233      | 12,354.55                   | 1,090.99             | 5.74                 | 190.01                | 2,375.31                |
|                         | <i>Meleagris gallopavo</i> | 32,801      | 8,315.85                    | 900.67               | 4.71                 | 191.27                | 1,999.30                |
|                         | <b>RNA-seq</b>             | PASA        | 60,697                      | 14,925.87            | 1,132.57             | 6.88                  | 164.57                  |
| Cufflinks <sup>59</sup> |                            | 35,577      | 24,131.15                   | 3,309.39             | 8.38                 | 394.76                | 2,820.16                |
| <b>EVM</b>              |                            | 24,855      | 16,188.96                   | 1,228.27             | 7.27                 | 168.92                | 2,385.63                |
| <b>Pasa-update*</b>     |                            | 24,688      | 17,192.64                   | 1,244.96             | 7.34                 | 169.66                | 2,516.29                |
| <b>Final set**</b>      |                            | 17,448      | 23,019.79                   | 1,533.17             | 9.52                 | 160.98                | 2,520.65                |

270 Note: \* includes the UTR region, others do not. \*\* contains the UTR region, which was  
271 obtained by removing the alternative splicing, selecting the longest transcript, removing  
272 redundant exons and filtering from the gene set of pasa2 update. Filtering conditions:  
273 overlap with TE greater than or equal to 20%, stop gain, only supported by *de novo* evidence,  
274 and rpkm expression in each tissue was less than 1.  
275

276 **Supplementary Table 9.** Statistical results of gene function annotation.

| <b>Database</b> | <b>Gene number</b> | <b>Percent (%)</b> |
|-----------------|--------------------|--------------------|
| Swissprot       | 16,381             | 93.90              |
| Nr              | 16,803             | 96.30              |
| KEGG            | 14,631             | 83.90              |
| InterPro        | 17,072             | 97.80              |
| GO              | 15,926             | 91.30              |
| Pfam            | 14,435             | 82.70              |
| Annotated       | 17,135             | 98.20              |
| Unannotated     | 313                | 1.80               |
| Total           | 17,448             | -                  |

277

278

279

280

281 **Supplementary Table 10.** The predicted genome-wide repetitive sequences of XGG.

| <b>Method</b>     | <b>Repeat Size (bp)</b> | <b>Percent (%)</b> |
|-------------------|-------------------------|--------------------|
| TRF               | 23,771,262              | 2.04               |
| RepeatMasker      | 99,737,512              | 8.55               |
| RepeatProteinMask | 53,067,289              | 4.55               |
| Total             | 118,586,730             | 10.17              |

282

283 **Supplementary Table 11.** Whole genome transposable elements (TE) of XGG.

| TE type           | Denovo+Repb<br>base Length<br>(bp) | % in<br>Genome | TE proteins<br>Length (bp) | % in<br>Genome | Combined<br>TEs Length<br>(bp) | % in<br>Genome |
|-------------------|------------------------------------|----------------|----------------------------|----------------|--------------------------------|----------------|
| DNA               | 1,737,587                          | 0.15           | 218,250                    | 0.02           | 1,919,410                      | 0.16           |
| LINE              | 67,441,314                         | 5.78           | 45,338,969                 | 3.89           | 72,973,327                     | 6.26           |
| SINE              | 292,458                            | 0.03           | 0                          | 0              | 292,458                        | 0.03           |
| LTR               | 28,477,183                         | 2.44           | 7,597,143                  | 0.65           | 29,561,807                     | 2.54           |
| Simple_re<br>peat | 2,171,633                          | 0.19           | 0                          | 0              | 2,171,633                      | 0.19           |
| Unknown           | 4,584,688                          | 0.39           | 0                          | 0              | 4,584,688                      | 0.39           |
| Total             | 99,737,512                         | 8.55           | 53,067,289                 | 4.55           | 103,475,240                    | 8.87           |

284 Note: Denovo+Repbase is a library predicted by RepeatModeler, RepeatScout and LTR\_FINDER  
 285 software combined with RepBase nucleotide library, using Uclust software to integrate according to the  
 286 80-80-80 principle, and then using RepeatMasker software to identify TEs; TE proteins are based on  
 287 RepBase protein library, using RepeatProteinMask software to identify TEs; Combined TEs is the result  
 288 of integrating the above two methods and removing redundancy. Unknown indicates that the repeat  
 289 sequence cannot be classified by RepeatMasker.

290

291

292

293 **Supplementary Table 12.** Noncoding RNA statistics in XGG.

| ncRNA Type |              | Copy<br>number | Mean length (bp) | Total length<br>(bp) | % of<br>genome |
|------------|--------------|----------------|------------------|----------------------|----------------|
| miRNA      |              | 424            | 85.59            | 36,290               | 0.003112       |
| tRNA       |              | 371            | 74.68            | 27,706               | 0.002376       |
| rRNA       | rRNA         | 234            | 247.90           | 58,009               | 0.004975       |
|            | 18S          | 20             | 683.45           | 13,669               | 0.001172       |
|            | 28S          | 85             | 339.14           | 28,827               | 0.002472       |
|            | 5.8S         | 8              | 155.38           | 1,243                | 0.000107       |
|            | 5S           | 121            | 117.93           | 14,270               | 0.001224       |
| snRNA      | snRNA        | 346            | 126.76           | 43,858               | 0.003761       |
|            | CD-box       | 114            | 92.05            | 10,494               | 0.000900       |
|            | HACA-<br>box | 81             | 139.48           | 11,298               | 0.000969       |
|            | splicing     | 132            | 142.40           | 18,797               | 0.001612       |

294

295 **Supplementary Table 13.** Reference chromosomes used in sex chromosomes  
 296 identification.

| <b>Chromosome</b> | <b>Species</b>                           | <b>Length (bp)</b> | <b>Assembly version</b> |
|-------------------|------------------------------------------|--------------------|-------------------------|
| Z                 | <i>Anas platyrhynchos</i> <sup>40</sup>  | 84,547,829         | GCF_015476345.1         |
| Z                 | <i>Coturnix japonica</i> <sup>60</sup>   | 67,000,979         | GCA_001577835.1         |
| Z                 | <i>Gallus gallus</i> <sup>52</sup>       | 82,529,921         | GCA_000002315.5         |
| Z                 | <i>Numididae</i> <sup>61</sup>           | 75,261,281         | GCA_002078875.2         |
| Z                 | <i>Parus major</i> <sup>62</sup>         | 74,514,349         | GCA_001522545.3         |
| Z                 | <i>Taeniopygia guttata</i> <sup>54</sup> | 78,980,481         | GCA_008822125.1         |
| W                 | <i>Anas platyrhynchos</i> <sup>40</sup>  | 16,693,329         | GCF_015476345.1         |
| W                 | <i>Coturnix japonica</i> <sup>60</sup>   | 122,254            | GCA_001577835.1         |
| W                 | <i>Gallus gallus</i> <sup>52</sup>       | 6,813,114          | GCA_000002315.5         |
| W                 | <i>Meleagris gallopavo</i> <sup>53</sup> | 313,225            | GCA_000146605.4         |

297



298 **Supplementary Table 14.** Sex-linked sequences identified in the genome of XGG.

| <b>Chromosome type</b> | <b>Sequence ID</b>                                    | <b>Length (bp)</b> |
|------------------------|-------------------------------------------------------|--------------------|
| W                      | Hic_4                                                 | 18,190,528         |
| W                      | original_scaffold_2066_obj_pilon                      | 6,053              |
| Z                      | Hic_3                                                 | 78,059,545         |
| Z                      | fragScaff_scaffold_42_obj_pilon:::fragment_2:::debris | 10,000             |
| Z                      | Super-Scaffold_84_pilon:::fragment_4:::debris         | 10,000             |
| Z                      | Super-Scaffold_29_pilon:::fragment_4:::debris         | 30,000             |
| Z                      | original_scaffold_1774_obj_pilon                      | 23,497             |
| Z                      | original_scaffold_265_obj_pilon                       | 31,285             |
| Z                      | original_scaffold_1886_obj_pilon                      | 14,535             |
| Z                      | Super-Scaffold_66_pilon:::fragment_6:::debris         | 20,000             |
| Z                      | original_scaffold_1674_obj_pilon                      | 50,807             |
| Z                      | original_scaffold_2242_obj_pilon                      | 13,126             |
| Z                      | original_scaffold_512_obj_pilon                       | 17,222             |
| Z                      | Super-Scaffold_29_pilon:::fragment_10:::debris        | 10,000             |
| Z                      | original_scaffold_462_obj_pilon                       | 11,778             |
| Z                      | Super-Scaffold_29_pilon:::fragment_14:::debris        | 30,000             |
| Z                      | original_scaffold_1741_obj_pilon                      | 10,647             |
| Z                      | Super-Scaffold_84_pilon:::fragment_6:::debris         | 50,000             |
| Z                      | Super-Scaffold_66_pilon:::fragment_2:::debris         | 50,000             |
| Z                      | Super-Scaffold_27_pilon:::fragment_2:::debris         | 50,000             |
| Z                      | original_scaffold_1602_obj_pilon                      | 10,177             |
| Z                      | original_scaffold_1079_obj_pilon                      | 7,689              |
| Z                      | Super-Scaffold_66_pilon:::fragment_4:::debris         | 50,000             |
| Z                      | Super-Scaffold_50_pilon:::fragment_2:::debris         | 10,000             |

299

300 **Supplementary Table 15.** Sequencing depth for each individual and their chromosomes in  
 301 162 geese.

| ID    | Sex    | Hic_19 | Hic_20 | Hic_21 | Hic_22 | Hic_23 | Hic_24 | Hic_25 | Hic_26 | Hic_27 | Hic_28 | Hic_29 | Hic_30 | Hic_31 | Hic_32 | Hic_33 | Hic_34 | Hic_35 | Hic_36 | Hic_37 | Hic_38 | Z    | W     |
|-------|--------|--------|--------|--------|--------|--------|--------|--------|--------|--------|--------|--------|--------|--------|--------|--------|--------|--------|--------|--------|--------|------|-------|
| FCG10 | female | 10.97  | 11.89  | 12.11  | 15.26  | 12.78  | 11.69  | 10.72  | 10.90  | 11.24  | 12.11  | 10.95  | 13.86  | 11.53  | 17.28  | 7.89   | 8.12   | 9.28   | 6.43   | 8.81   | 35.71  | 4.99 | 10.29 |
| FCG12 | female | 11.68  | 12.85  | 12.98  | 16.82  | 13.71  | 12.50  | 11.39  | 11.85  | 12.11  | 13.04  | 11.55  | 14.22  | 12.35  | 18.29  | 9.37   | 8.51   | 9.96   | 6.88   | 9.47   | 37.65  | 5.41 | 11.00 |
| FCG13 | female | 10.58  | 10.69  | 11.56  | 13.03  | 11.21  | 10.38  | 9.54   | 9.54   | 10.13  | 9.75   | 7.97   | 8.78   | 5.81   | 13.38  | 5.03   | 4.07   | 6.22   | 3.51   | 5.68   | 21.12  | 4.87 | 7.63  |
| FCG14 | female | 12.41  | 13.17  | 14.33  | 18.26  | 14.54  | 13.16  | 12.08  | 12.39  | 12.55  | 13.59  | 12.26  | 15.32  | 11.98  | 19.70  | 9.46   | 9.25   | 10.19  | 7.13   | 9.73   | 37.39  | 5.70 | 11.11 |
| FCG16 | female | 13.24  | 13.94  | 15.11  | 19.67  | 15.59  | 13.99  | 12.79  | 13.27  | 13.54  | 14.36  | 12.81  | 16.02  | 13.20  | 18.63  | 12.13  | 9.61   | 10.80  | 7.62   | 10.35  | 39.92  | 6.19 | 11.85 |
| FCG17 | female | 10.78  | 11.24  | 12.33  | 15.63  | 12.27  | 11.09  | 10.12  | 10.36  | 10.75  | 11.14  | 9.67   | 12.42  | 9.04   | 14.84  | 7.20   | 6.19   | 8.30   | 5.45   | 7.44   | 28.26  | 4.87 | 9.03  |
| FCG18 | female | 11.96  | 13.71  | 13.52  | 17.97  | 14.67  | 13.17  | 11.99  | 12.50  | 12.63  | 13.81  | 12.46  | 16.41  | 13.55  | 20.21  | 10.11  | 9.64   | 10.68  | 7.43   | 10.44  | 37.47  | 4.65 | 11.21 |
| FCG19 | female | 9.44   | 9.99   | 10.51  | 13.36  | 11.03  | 10.02  | 9.12   | 9.50   | 9.73   | 10.55  | 9.33   | 11.88  | 9.72   | 15.31  | 7.17   | 7.10   | 8.42   | 5.70   | 7.75   | 30.90  | 4.31 | 8.76  |
| FCG1  | female | 11.12  | 11.65  | 12.42  | 15.96  | 13.11  | 11.81  | 10.71  | 11.17  | 11.42  | 12.20  | 10.71  | 14.23  | 11.54  | 17.53  | 9.10   | 8.24   | 10.31  | 7.08   | 8.68   | 32.80  | 5.23 | 10.26 |
| FCG20 | female | 11.39  | 12.21  | 12.96  | 17.01  | 13.52  | 12.14  | 11.05  | 11.62  | 11.62  | 12.54  | 11.23  | 13.94  | 11.71  | 17.68  | 9.08   | 8.55   | 9.43   | 6.46   | 9.00   | 32.01  | 5.24 | 10.29 |
| FCG21 | female | 10.98  | 11.88  | 12.14  | 15.74  | 12.94  | 11.72  | 10.56  | 11.05  | 11.27  | 12.24  | 10.68  | 13.92  | 11.36  | 17.14  | 9.36   | 8.03   | 9.45   | 6.40   | 9.06   | 31.92  | 5.10 | 10.14 |
| FCG24 | female | 12.85  | 13.68  | 14.74  | 19.21  | 15.35  | 13.93  | 12.59  | 13.16  | 13.24  | 14.34  | 12.82  | 16.29  | 13.69  | 20.77  | 10.50  | 9.83   | 11.14  | 7.67   | 10.85  | 40.31  | 5.85 | 11.97 |
| FCG25 | female | 11.85  | 12.07  | 13.03  | 14.65  | 12.89  | 11.74  | 10.97  | 10.51  | 11.29  | 10.66  | 8.84   | 10.24  | 5.83   | 11.24  | 4.29   | 3.86   | 6.41   | 3.83   | 5.60   | 23.79  | 4.64 | 8.25  |
| FCG26 | female | 12.79  | 13.78  | 14.45  | 18.54  | 15.05  | 13.52  | 12.36  | 12.82  | 13.13  | 14.15  | 12.93  | 16.17  | 13.20  | 20.98  | 9.57   | 10.09  | 10.65  | 7.65   | 10.16  | 35.41  | 5.85 | 11.34 |
| FCG27 | female | 14.20  | 14.89  | 15.69  | 19.75  | 16.60  | 15.06  | 13.60  | 13.97  | 14.71  | 15.85  | 13.80  | 17.06  | 14.88  | 23.56  | 12.08  | 10.56  | 12.60  | 9.29   | 11.61  | 44.52  | 6.70 | 13.01 |
| FCG28 | female | 16.36  | 17.68  | 18.98  | 24.34  | 19.42  | 17.40  | 15.87  | 16.36  | 16.87  | 18.28  | 16.18  | 20.78  | 17.12  | 26.29  | 12.29  | 11.90  | 13.29  | 9.98   | 13.27  | 53.03  | 4.65 | 14.65 |
| FCG29 | female | 13.49  | 13.85  | 14.82  | 17.41  | 14.93  | 13.72  | 12.75  | 12.66  | 12.96  | 12.92  | 10.95  | 12.55  | 8.16   | 16.85  | 7.15   | 5.24   | 8.36   | 5.50   | 7.95   | 34.44  | 7.13 | 10.26 |
| FCG2  | female | 12.41  | 13.53  | 13.92  | 17.49  | 14.51  | 13.12  | 11.94  | 12.37  | 12.65  | 13.49  | 12.23  | 16.34  | 13.01  | 22.73  | 9.82   | 8.76   | 10.07  | 7.10   | 9.83   | 36.26  | 4.75 | 11.17 |
| FCG30 | female | 12.08  | 12.95  | 13.24  | 17.19  | 13.98  | 12.71  | 11.70  | 12.25  | 12.45  | 13.29  | 11.93  | 14.82  | 12.18  | 18.63  | 8.61   | 8.70   | 9.86   | 6.99   | 9.47   | 37.30  | 4.74 | 10.99 |
| FCG32 | female | 12.71  | 13.92  | 14.67  | 19.40  | 15.05  | 13.67  | 12.32  | 12.73  | 12.99  | 14.11  | 12.73  | 15.77  | 13.24  | 20.20  | 9.24   | 9.47   | 12.00  | 8.61   | 10.35  | 38.89  | 4.11 | 11.63 |
| FCG33 | female | 13.19  | 14.60  | 14.64  | 18.88  | 15.69  | 14.19  | 12.98  | 13.49  | 13.91  | 14.89  | 13.37  | 17.26  | 14.02  | 19.39  | 10.34  | 10.21  | 12.12  | 8.90   | 10.89  | 39.82  | 4.75 | 12.14 |
| FCG34 | female | 12.67  | 13.71  | 13.79  | 17.38  | 14.71  | 13.42  | 12.33  | 12.65  | 13.00  | 14.00  | 12.53  | 15.75  | 12.99  | 20.77  | 9.28   | 8.80   | 10.13  | 6.99   | 9.97   | 35.28  | 4.24 | 11.27 |
| FCG35 | female | 11.90  | 12.67  | 13.27  | 16.74  | 14.05  | 12.86  | 11.70  | 12.06  | 12.27  | 13.28  | 11.97  | 15.42  | 12.29  | 18.76  | 7.57   | 8.14   | 9.40   | 6.56   | 8.90   | 37.60  | 6.15 | 10.94 |
| FCG37 | female | 13.74  | 14.95  | 15.58  | 19.94  | 16.31  | 14.74  | 13.32  | 13.82  | 14.26  | 15.43  | 13.83  | 16.89  | 14.34  | 21.37  | 10.14  | 10.34  | 11.60  | 8.33   | 11.30  | 43.07  | 4.42 | 12.20 |
| FCG38 | female | 14.53  | 16.78  | 16.31  | 23.25  | 19.01  | 17.60  | 15.99  | 17.26  | 16.62  | 19.55  | 19.51  | 23.92  | 23.90  | 29.14  | 17.01  | 16.38  | 18.76  | 15.50  | 17.20  | 54.59  | 5.10 | 14.88 |
| FCG39 | female | 11.84  | 12.54  | 12.79  | 15.48  | 13.07  | 12.07  | 11.07  | 11.14  | 11.61  | 11.81  | 10.45  | 12.73  | 9.23   | 15.58  | 7.37   | 6.89   | 9.32   | 6.38   | 7.99   | 31.74  | 3.89 | 9.38  |
| FCG3  | female | 13.68  | 14.80  | 14.81  | 18.55  | 15.88  | 14.56  | 13.18  | 13.71  | 14.02  | 15.14  | 13.35  | 16.78  | 14.29  | 19.83  | 11.18  | 9.78   | 11.57  | 8.38   | 10.59  | 36.85  | 5.06 | 12.29 |
| FCG40 | female | 11.18  | 11.86  | 12.10  | 15.13  | 12.96  | 11.90  | 10.81  | 11.28  | 11.55  | 12.56  | 11.43  | 15.11  | 11.87  | 17.71  | 8.64   | 8.74   | 9.75   | 6.82   | 9.25   | 32.11  | 5.88 | 10.21 |
| FCG41 | female | 11.92  | 12.76  | 13.46  | 17.02  | 13.93  | 12.54  | 11.45  | 11.88  | 12.13  | 13.00  | 11.45  | 14.51  | 11.96  | 20.33  | 9.05   | 8.89   | 10.90  | 7.61   | 9.65   | 38.42  | 6.37 | 10.89 |
| FCG42 | female | 11.62  | 12.09  | 13.28  | 16.92  | 13.73  | 12.33  | 11.17  | 11.52  | 11.95  | 12.58  | 11.28  | 14.70  | 11.14  | 18.72  | 9.31   | 7.59   | 9.77   | 6.63   | 9.33   | 39.08  | 4.75 | 10.65 |
| FCG43 | female | 13.23  | 14.03  | 14.75  | 17.58  | 14.61  | 13.95  | 12.67  | 12.99  | 13.29  | 13.77  | 12.66  | 14.32  | 10.48  | 21.20  | 9.89   | 8.49   | 10.95  | 7.66   | 10.39  | 35.39  | 4.16 | 11.33 |
| FCG44 | female | 13.66  | 14.99  | 15.44  | 19.86  | 16.13  | 14.67  | 13.26  | 13.82  | 14.15  | 15.27  | 13.78  | 16.63  | 13.99  | 23.95  | 10.58  | 10.94  | 12.85  | 9.08   | 10.66  | 39.02  | 5.24 | 12.38 |
| FCG45 | female | 9.82   | 10.39  | 11.10  | 14.40  | 11.56  | 10.30  | 9.43   | 9.75   | 10.08  | 10.76  | 9.58   | 12.59  | 10.18  | 15.41  | 8.31   | 7.56   | 8.72   | 5.79   | 8.00   | 27.24  | 6.24 | 8.88  |
| FCG47 | female | 7.84   | 8.06   | 8.70   | 11.12  | 9.13   | 8.24   | 7.48   | 7.77   | 7.96   | 8.55   | 7.67   | 9.96   | 8.19   | 12.32  | 5.89   | 5.72   | 6.94   | 4.58   | 6.17   | 21.95  | 3.56 | 7.24  |
| FCG48 | female | 11.81  | 12.54  | 12.95  | 16.79  | 13.84  | 12.48  | 11.32  | 11.73  | 12.18  | 13.02  | 11.22  | 15.17  | 12.13  | 20.38  | 9.51   | 7.91   | 9.50   | 6.52   | 9.43   | 34.75  | 7.21 | 10.78 |
| FCG51 | female | 10.85  | 11.65  | 12.29  | 16.19  | 13.09  | 11.74  | 10.71  | 11.05  | 11.25  | 12.19  | 10.77  | 14.16  | 11.56  | 16.81  | 9.27   | 8.31   | 9.32   | 6.37   | 8.97   | 30.57  | 4.69 | 9.84  |
| FCG5  | female | 11.86  | 12.45  | 13.50  | 17.43  | 14.05  | 12.44  | 11.23  | 11.73  | 12.10  | 12.88  | 11.11  | 15.20  | 11.87  | 21.18  | 9.10   | 8.65   | 9.86   | 6.51   | 9.00   | 37.44  | 4.62 | 11.05 |
| FCG6  | female | 12.03  | 12.85  | 13.81  | 17.45  | 14.16  | 12.79  | 11.56  | 11.99  | 12.25  | 13.19  | 11.47  | 15.70  | 12.18  | 20.51  | 8.83   | 8.48   | 10.00  | 6.93   | 9.58   | 36.48  | 5.00 | 10.99 |
| FCG7  | female | 10.07  | 10.57  | 11.11  | 14.34  | 11.91  | 10.76  | 9.70   | 10.11  | 10.38  | 11.09  | 9.85   | 12.70  | 10.62  | 15.74  | 7.57   | 7.15   | 8.92   | 5.70   | 7.78   | 29.45  | 4.89 | 9.39  |
| FCG8  | female | 12.21  | 13.31  | 13.71  | 18.44  | 14.86  | 12.88  | 11.44  | 11.99  | 12.87  | 13.90  | 11.69  | 16.68  | 15.41  | 19.58  | 9.68   | 9.66   | 10.51  | 7.61   | 10.02  | 38.26  | 5.07 | 11.82 |
| FCG9  | female | 10.06  | 10.87  | 11.54  | 14.80  | 11.77  | 10.65  | 9.70   | 10.01  | 10.18  | 10.96  | 9.65   | 12.03  | 9.72   | 15.40  | 8.01   | 7.28   | 8.77   | 5.94   | 7.82   | 30.92  | 4.40 | 9.06  |
| GFW11 | female | 14.57  | 15.04  | 16.32  | 20.58  | 16.94  | 15.35  | 13.87  | 14.34  | 14.81  | 15.72  | 13.86  | 17.50  | 14.30  | 22.88  | 11.10  | 10.16  | 11.85  | 8.41   | 11.54  | 43.15  | 4.85 | 13.08 |
| GFW14 | female | 14.89  | 15.77  | 16.10  | 19.59  | 17.09  | 15.49  | 13.88  | 14.48  | 15.07  | 15.78  | 13.52  | 17.38  | 13.28  | 25.16  | 10.77  | 10.82  | 12.52  | 9.03   | 10.98  | 39.32  | 5.67 | 13.46 |
| GFW15 | female | 11.62  | 12.23  | 13.11  | 16.55  | 13.54  | 12.09  | 10.86  | 11.34  | 11.79  | 12.45  | 10.82  | 13.94  | 10.88  | 17.75  | 8.92   | 8.33   | 10.25  | 7.16   | 9.29   | 31.47  | 5.29 | 10.74 |
| GFW16 | female | 14.70  | 15.17  | 15.82  | 18.99  | 16.55  | 15.23  | 13.66  | 14.15  | 14.77  | 15.64  | 13.50  | 16.71  | 13.79  | 22.64  | 11.05  | 10.51  | 11.86  | 8.16   | 11.26  | 40.23  | 4.15 | 13.46 |
| GFW17 | female | 12.47  | 13.08  | 13.19  | 15.83  | 13.97  | 13.14  | 11.73  | 12.34  | 12.62  | 13.19  | 11.59  | 14.67  | 11.27  | 17.19  | 9.20   | 9.17   | 10.61  | 7.10   | 9.65   | 36.18  | 5.01 | 11.34 |
| GFW19 | female | 16.30  | 17.05  | 18.20  | 22.71  | 18.71  | 16.77  | 15.29  | 15.90  | 16.39  | 17.38  | 14.87  | 19.44  | 15.40  | 25.78  | 13.86  | 11.71  | 13.59  | 9.61   | 12.78  | 50.66  | 4.94 | 15.03 |
| GFW21 | female | 11.73  | 12.38  | 13.30  | 16.11  | 13.17  | 12.32  | 11.06  | 11.51  | 11.56  | 12.10  | 10.71  | 12.28  | 8.67   | 17.78  | 7.97   | 7.52   | 10.50  | 7.11   | 8.50   | 27.46  | 4.13 | 10.17 |
| GFW23 | female | 9.65   | 10.98  | 10.20  | 14.36  | 13.95  | 10.88  | 8.77   | 9.25   | 11.21  | 12.26  | 9.18   | 14.99  | 17.87  | 15.08  | 8.60   | 8.78   | 10.01  | 6.96   | 8.41   | 37.35  | 5.06 | 11.38 |
| GFW24 | female | 13.75  | 14.95  | 15.02  | 18.77  | 15.99  | 14.93  | 13.24  | 13.90  | 14.12  | 15.06  | 13.57  | 16.36  | 13.96  | 24.05  | 11.04  | 10.67  | 12.19  | 8.66   | 11.54  | 38.55  | 7.44 | 12.37 |
| GFW27 | female | 11.35  | 12.14  | 12.84  | 15.99  | 13.10  | 11.76  | 10.63  | 11.18  | 11.41  | 12.13  | 10.48  | 13.69  | 10.50  | 19.22  | 8.70   | 8.54   | 10.78  | 7.50   | 8.74   | 32.10  | 4.55 | 10.49 |
| GFW29 | female | 12.55  | 13.06  | 13.66  | 16.51  | 13.98  | 12.67  | 11     |        |        |        |        |        |        |        |        |        |        |        |        |        |      |       |

302 **Supplementary Table 15. Sequencing depth statistics of each chromosome in 162 geese**  
 303 (Continued).

| ID    | Sex    | Hic_19 | Hic_20 | Hic_21 | Hic_22 | Hic_23 | Hic_24 | Hic_25 | Hic_26 | Hic_27 | Hic_28 | Hic_29 | Hic_30 | Hic_31 | Hic_32 | Hic_33 | Hic_34 | Hic_35 | Hic_36 | Hic_37 | Hic_38 | Z     | W     |
|-------|--------|--------|--------|--------|--------|--------|--------|--------|--------|--------|--------|--------|--------|--------|--------|--------|--------|--------|--------|--------|--------|-------|-------|
| GFW39 | female | 12.69  | 12.83  | 13.98  | 15.94  | 13.55  | 12.53  | 11.64  | 11.70  | 11.95  | 11.79  | 9.94   | 11.68  | 6.77   | 16.57  | 5.52   | 4.93   | 7.51   | 4.72   | 6.68   | 26.32  | 6.25  | 9.62  |
| GFW45 | female | 14.59  | 14.78  | 16.45  | 20.50  | 16.57  | 14.94  | 13.29  | 13.85  | 14.49  | 15.15  | 12.64  | 17.06  | 13.20  | 22.94  | 10.61  | 9.61   | 11.39  | 7.69   | 10.53  | 40.56  | 7.02  | 13.37 |
| GFW46 | female | 12.23  | 12.38  | 13.59  | 16.42  | 13.64  | 12.45  | 11.22  | 11.49  | 11.93  | 12.23  | 10.30  | 13.22  | 9.07   | 17.33  | 7.76   | 6.62   | 8.63   | 5.57   | 8.00   | 30.62  | 5.79  | 10.21 |
| GFW47 | female | 14.24  | 15.30  | 16.02  | 19.57  | 16.46  | 14.81  | 13.11  | 13.59  | 14.37  | 15.27  | 12.95  | 16.34  | 12.93  | 22.06  | 10.49  | 10.00  | 12.17  | 8.16   | 10.46  | 38.84  | 6.20  | 13.47 |
| GFW5  | female | 14.11  | 15.03  | 15.67  | 19.24  | 16.12  | 14.54  | 13.23  | 13.79  | 14.29  | 14.94  | 13.02  | 15.84  | 12.84  | 23.25  | 10.05  | 10.12  | 11.89  | 7.89   | 10.53  | 43.04  | 5.77  | 12.90 |
| GFW7  | female | 15.80  | 16.83  | 17.49  | 21.35  | 18.20  | 16.57  | 14.97  | 15.45  | 16.09  | 16.81  | 15.01  | 18.91  | 14.75  | 25.24  | 11.64  | 11.78  | 13.06  | 9.20   | 12.18  | 45.22  | 6.17  | 14.65 |
| GFW8  | female | 11.94  | 12.35  | 13.46  | 17.08  | 13.84  | 12.57  | 11.27  | 11.70  | 12.06  | 12.80  | 11.13  | 14.46  | 11.47  | 18.60  | 9.29   | 8.57   | 10.69  | 7.21   | 9.36   | 35.55  | 5.22  | 10.84 |
| GFW9  | female | 16.03  | 16.77  | 17.96  | 22.27  | 18.59  | 16.81  | 15.06  | 15.60  | 16.25  | 17.20  | 14.99  | 18.95  | 15.46  | 25.67  | 12.59  | 11.43  | 13.89  | 9.96   | 12.31  | 45.67  | 5.48  | 15.15 |
| LHW10 | female | 13.68  | 14.72  | 15.12  | 18.53  | 15.60  | 14.05  | 12.78  | 13.14  | 13.74  | 14.38  | 12.42  | 15.48  | 11.95  | 18.36  | 10.16  | 9.35   | 11.71  | 8.26   | 10.30  | 38.31  | 4.33  | 12.83 |
| LHW11 | female | 14.00  | 15.16  | 16.86  | 21.57  | 16.69  | 14.68  | 13.07  | 13.36  | 14.18  | 14.81  | 12.67  | 15.32  | 12.34  | 19.39  | 9.07   | 9.17   | 12.10  | 8.47   | 10.04  | 38.34  | 4.38  | 13.03 |
| LHW1  | female | 12.33  | 12.50  | 14.10  | 16.86  | 13.64  | 12.53  | 11.46  | 11.84  | 12.11  | 12.43  | 10.58  | 12.40  | 8.31   | 13.81  | 7.58   | 5.91   | 9.40   | 6.26   | 8.07   | 33.29  | 6.26  | 10.53 |
| LHW2  | female | 14.61  | 15.45  | 16.17  | 18.89  | 16.01  | 15.08  | 13.85  | 14.19  | 14.40  | 14.79  | 13.11  | 14.52  | 10.25  | 19.27  | 9.27   | 7.90   | 10.18  | 7.28   | 9.99   | 37.47  | 6.24  | 11.69 |
| LHW3  | female | 13.31  | 14.20  | 15.17  | 18.56  | 14.83  | 13.71  | 12.67  | 12.87  | 13.25  | 13.45  | 12.04  | 14.69  | 9.79   | 20.73  | 7.79   | 7.25   | 9.60   | 6.38   | 8.64   | 32.84  | 3.29  | 11.29 |
| LHW5  | female | 15.93  | 17.50  | 18.15  | 23.19  | 18.99  | 16.96  | 15.21  | 15.78  | 16.32  | 17.30  | 15.03  | 18.73  | 15.45  | 25.83  | 12.27  | 11.35  | 13.44  | 9.79   | 12.33  | 42.89  | 5.64  | 14.83 |
| LHW6  | female | 8.75   | 9.45   | 9.69   | 11.77  | 9.81   | 8.86   | 7.92   | 8.23   | 8.83   | 9.18   | 7.59   | 10.17  | 7.52   | 12.80  | 6.06   | 5.67   | 7.20   | 4.56   | 6.29   | 24.50  | 4.48  | 8.08  |
| LHW7  | female | 10.06  | 10.72  | 11.75  | 14.93  | 11.72  | 10.33  | 9.34   | 9.78   | 10.23  | 10.63  | 8.94   | 11.78  | 8.94   | 14.50  | 7.31   | 7.21   | 9.38   | 6.15   | 7.72   | 27.59  | 5.26  | 9.34  |
| LHW8  | female | 13.51  | 14.57  | 15.50  | 19.42  | 15.79  | 14.05  | 12.60  | 13.12  | 13.70  | 14.33  | 12.18  | 15.65  | 12.12  | 20.86  | 9.89   | 9.07   | 12.17  | 9.02   | 9.98   | 36.47  | 6.06  | 12.67 |
| LHW9  | female | 13.23  | 14.23  | 14.74  | 17.87  | 15.01  | 13.53  | 12.16  | 12.78  | 13.35  | 13.86  | 11.61  | 15.69  | 11.87  | 19.15  | 9.85   | 9.01   | 10.42  | 7.20   | 9.87   | 38.02  | 5.80  | 12.41 |
| LXW10 | female | 13.30  | 13.80  | 14.44  | 16.99  | 14.85  | 13.90  | 12.72  | 12.82  | 13.07  | 13.62  | 11.83  | 14.36  | 9.87   | 17.11  | 8.33   | 7.73   | 9.83   | 6.55   | 9.23   | 32.77  | 5.56  | 10.30 |
| LXW11 | female | 10.06  | 11.07  | 11.32  | 13.52  | 11.54  | 10.42  | 9.25   | 9.68   | 10.26  | 10.59  | 9.03   | 11.33  | 8.64   | 13.51  | 7.41   | 6.86   | 8.55   | 5.57   | 7.55   | 28.23  | 5.35  | 9.50  |
| LXW12 | female | 10.65  | 11.78  | 12.25  | 15.23  | 12.41  | 11.03  | 9.92   | 10.38  | 10.81  | 11.48  | 9.74   | 12.64  | 9.81   | 17.30  | 8.14   | 7.51   | 9.70   | 6.68   | 8.23   | 30.69  | 4.07  | 10.09 |
| LXW14 | female | 13.49  | 14.25  | 14.82  | 18.18  | 15.37  | 13.84  | 12.24  | 12.81  | 13.55  | 14.35  | 11.70  | 14.85  | 11.79  | 19.63  | 9.67   | 8.93   | 11.70  | 8.19   | 10.08  | 41.20  | 5.94  | 12.52 |
| LXW16 | female | 12.74  | 13.56  | 13.63  | 16.85  | 14.63  | 13.35  | 12.02  | 12.50  | 12.80  | 13.78  | 12.18  | 16.05  | 12.45  | 19.35  | 9.81   | 9.00   | 10.17  | 7.12   | 10.00  | 37.77  | 3.80  | 11.71 |
| LXW20 | female | 12.99  | 13.37  | 15.31  | 19.29  | 15.31  | 13.51  | 12.08  | 12.56  | 13.09  | 14.05  | 11.92  | 15.70  | 12.27  | 19.67  | 10.15  | 9.05   | 11.22  | 7.59   | 10.32  | 33.54  | 4.81  | 11.49 |
| LXW22 | female | 11.00  | 11.24  | 12.01  | 13.32  | 11.76  | 10.58  | 9.94   | 9.59   | 10.40  | 9.80   | 7.85   | 8.81   | 5.31   | 10.86  | 4.18   | 3.55   | 6.14   | 3.56   | 6.22   | 20.52  | 6.88  | 7.29  |
| LXW23 | female | 10.77  | 11.68  | 12.79  | 16.40  | 12.84  | 11.32  | 10.15  | 10.58  | 11.05  | 11.55  | 10.07  | 13.21  | 9.82   | 18.42  | 9.11   | 7.82   | 9.77   | 6.74   | 8.45   | 32.41  | 5.04  | 10.15 |
| LXW24 | female | 14.86  | 15.21  | 15.89  | 17.43  | 15.64  | 14.43  | 13.32  | 13.05  | 14.08  | 13.46  | 10.78  | 12.70  | 7.65   | 17.35  | 6.86   | 5.55   | 8.29   | 5.27   | 7.52   | 33.09  | 6.40  | 10.60 |
| LXW25 | female | 11.26  | 11.74  | 12.51  | 15.30  | 12.88  | 11.68  | 10.44  | 10.89  | 11.33  | 12.01  | 10.34  | 13.33  | 10.02  | 17.15  | 7.73   | 7.36   | 10.37  | 7.55   | 8.69   | 32.87  | 4.08  | 10.41 |
| LXW27 | female | 11.68  | 12.60  | 12.72  | 15.65  | 13.28  | 11.97  | 10.76  | 11.26  | 11.66  | 12.13  | 10.66  | 13.15  | 10.58  | 16.35  | 8.90   | 7.87   | 10.11  | 6.66   | 8.96   | 34.05  | 5.41  | 10.45 |
| LXW29 | female | 14.48  | 15.44  | 17.10  | 21.19  | 16.72  | 14.92  | 13.31  | 13.84  | 14.60  | 15.09  | 12.63  | 16.03  | 12.34  | 22.73  | 10.16  | 9.47   | 11.78  | 8.23   | 10.57  | 41.39  | 5.14  | 13.30 |
| LXW2  | female | 15.07  | 15.98  | 17.21  | 21.23  | 17.22  | 15.61  | 14.12  | 14.64  | 15.33  | 15.76  | 13.77  | 17.88  | 12.45  | 21.66  | 10.84  | 10.10  | 12.22  | 8.56   | 11.50  | 40.82  | 4.92  | 13.60 |
| LXW31 | female | 14.56  | 15.17  | 16.46  | 19.55  | 16.17  | 15.05  | 13.78  | 14.36  | 14.53  | 14.97  | 13.27  | 14.71  | 10.88  | 22.38  | 9.80   | 8.60   | 11.59  | 7.68   | 10.93  | 38.18  | 4.43  | 12.53 |
| LXW32 | female | 13.97  | 15.00  | 16.08  | 19.86  | 15.79  | 14.56  | 13.24  | 13.72  | 13.84  | 14.50  | 12.91  | 15.64  | 11.40  | 20.09  | 9.77   | 8.08   | 11.74  | 7.86   | 10.37  | 38.73  | 5.07  | 12.50 |
| LXW34 | female | 13.71  | 14.49  | 15.04  | 19.25  | 16.05  | 14.52  | 13.15  | 13.65  | 14.18  | 15.40  | 13.63  | 17.21  | 14.51  | 21.16  | 10.86  | 10.90  | 12.65  | 8.89   | 11.38  | 39.32  | 5.57  | 12.35 |
| LXW36 | female | 11.15  | 11.95  | 12.23  | 15.76  | 12.99  | 11.96  | 10.88  | 11.36  | 11.44  | 12.62  | 11.41  | 14.49  | 11.64  | 15.42  | 8.71   | 8.47   | 11.01  | 8.15   | 9.13   | 32.66  | 5.78  | 10.06 |
| LXW37 | female | 13.18  | 14.73  | 14.29  | 17.98  | 15.26  | 13.97  | 12.78  | 13.17  | 13.53  | 14.78  | 13.47  | 17.73  | 13.82  | 21.11  | 10.79  | 10.30  | 12.63  | 9.03   | 11.10  | 41.56  | 4.23  | 12.03 |
| LXW3  | female | 13.26  | 15.09  | 15.53  | 20.05  | 16.31  | 14.50  | 13.05  | 13.69  | 13.89  | 15.39  | 13.60  | 17.65  | 14.49  | 22.50  | 11.15  | 10.52  | 12.54  | 9.27   | 11.44  | 41.71  | 4.40  | 12.88 |
| LXW40 | female | 11.70  | 12.93  | 13.00  | 17.35  | 14.43  | 12.56  | 11.40  | 11.82  | 12.42  | 13.57  | 12.10  | 16.17  | 14.59  | 16.25  | 10.32  | 10.37  | 12.14  | 8.47   | 10.55  | 37.28  | 6.11  | 11.42 |
| LXW42 | female | 17.29  | 18.81  | 19.84  | 25.21  | 20.21  | 18.27  | 16.65  | 17.41  | 17.64  | 18.85  | 16.41  | 20.76  | 16.48  | 26.19  | 13.82  | 12.29  | 15.38  | 10.99  | 13.76  | 49.63  | 4.30  | 16.04 |
| LXW43 | female | 14.55  | 15.49  | 16.33  | 20.61  | 17.05  | 15.46  | 14.08  | 14.67  | 14.78  | 16.20  | 13.90  | 17.42  | 14.11  | 21.78  | 10.37  | 10.18  | 13.36  | 9.62   | 11.10  | 38.63  | 5.30  | 13.24 |
| LXW44 | female | 17.68  | 18.39  | 20.09  | 24.10  | 19.70  | 18.56  | 17.23  | 17.82  | 17.59  | 18.73  | 17.20  | 18.19  | 13.25  | 25.21  | 13.28  | 11.61  | 14.71  | 10.77  | 13.41  | 42.63  | 4.00  | 14.29 |
| LXW46 | female | 13.07  | 14.02  | 14.85  | 18.71  | 15.43  | 13.89  | 12.61  | 13.08  | 13.42  | 14.41  | 12.62  | 15.82  | 12.60  | 20.45  | 9.26   | 9.00   | 12.18  | 8.74   | 10.08  | 34.42  | 4.66  | 11.80 |
| LXW48 | female | 13.99  | 14.96  | 16.31  | 21.54  | 16.80  | 14.96  | 13.49  | 14.12  | 14.36  | 15.70  | 13.97  | 17.73  | 14.41  | 21.61  | 11.95  | 10.67  | 13.60  | 9.81   | 11.67  | 39.95  | 5.75  | 12.34 |
| LXW5  | female | 13.14  | 13.83  | 14.61  | 18.16  | 15.30  | 13.70  | 12.22  | 12.69  | 13.41  | 14.24  | 12.09  | 16.30  | 13.38  | 19.69  | 9.88   | 10.05  | 11.54  | 7.78   | 10.54  | 38.90  | 4.62  | 12.00 |
| LXW7  | female | 13.21  | 14.19  | 16.85  | 22.48  | 16.25  | 13.98  | 12.84  | 13.49  | 13.49  | 14.52  | 13.14  | 16.87  | 13.18  | 22.91  | 10.03  | 10.17  | 12.41  | 8.55   | 10.68  | 40.14  | 4.54  | 12.78 |
| LXW8  | female | 11.86  | 12.69  | 14.73  | 19.62  | 14.38  | 12.50  | 11.44  | 11.94  | 12.08  | 12.89  | 11.67  | 14.86  | 11.61  | 20.06  | 8.83   | 8.99   | 10.99  | 7.49   | 9.43   | 34.77  | 4.25  | 11.23 |
| FCG11 | male   | 11.98  | 12.87  | 13.60  | 17.58  | 14.16  | 12.61  | 11.64  | 11.99  | 12.40  | 13.21  | 11.59  | 15.20  | 12.09  | 19.26  | 8.76   | 8.43   | 9.99   | 7.04   | 9.28   | 31.87  | 10.80 | 6.32  |
| FCG15 | male   | 9.67   | 10.51  | 10.47  | 13.05  | 11.22  | 10.08  | 9.26   | 9.41   | 9.75   | 10.50  | 9.13   | 11.98  | 9.72   | 17.44  | 6.90   | 6.86   | 8.08   | 5.45   | 7.57   | 25.62  | 8.74  | 5.06  |
| FCG22 | male   | 13.03  | 14.05  | 15.03  | 20.02  | 15.65  | 13.85  | 12.75  | 13.09  | 13.60  | 14.54  | 12.87  | 16.16  | 13.39  | 19.95  | 9.66   | 9.47   | 11.28  | 8.15   | 10.50  | 35.94  | 11.68 | 6.87  |
| FCG23 | male   | 11.04  | 12.10  | 12.03  | 14.84  | 12.79  | 11.55  | 10.62  | 11.02  | 11.26  | 12.15  | 10.87  | 13.62  | 11.35  | 16.75  | 8.28   | 8.13   | 9.42   | 6.43   | 8.43   | 26.48  | 9.78  | 5.87  |
| FCG31 | male   | 10.41  | 11.22  | 11.66  | 15.11  | 12.32  | 10.99  | 10.05  | 10.46  | 10.81  | 11.63  | 10.32  | 13.32  | 11.01  | 16.01  | 7.79   | 7.76   | 8.95   | 6.21   | 8.35   | 27.72  | 9.78  | 5.52  |
| FCG36 | male   | 12.95  | 14.04  | 14.76  | 19.66  | 15.65  | 13.4   |        |        |        |        |        |        |        |        |        |        |        |        |        |        |       |       |

304 **Supplementary Table 15.** Sequencing depth statistics of each chromosome in 162 geese  
 305 (Continued).

| ID    | Sex  | Hic_19 | Hic_20 | Hic_21 | Hic_22 | Hic_23 | Hic_24 | Hic_25 | Hic_26 | Hic_27 | Hic_28 | Hic_29 | Hic_30 | Hic_31 | Hic_32 | Hic_33 | Hic_34 | Hic_35 | Hic_36 | Hic_37 | Hic_38 | Z     | W    |
|-------|------|--------|--------|--------|--------|--------|--------|--------|--------|--------|--------|--------|--------|--------|--------|--------|--------|--------|--------|--------|--------|-------|------|
| GFW13 | male | 13.57  | 14.20  | 14.95  | 18.46  | 15.74  | 14.09  | 12.79  | 13.26  | 13.64  | 14.63  | 12.46  | 16.18  | 12.52  | 21.08  | 9.51   | 9.47   | 11.49  | 8.26   | 10.87  | 38.33  | 9.55  | 7.08 |
| GFW18 | male | 13.40  | 13.90  | 14.70  | 18.12  | 15.09  | 13.81  | 12.48  | 12.90  | 13.41  | 14.14  | 12.26  | 15.88  | 12.75  | 21.60  | 10.16  | 9.49   | 11.07  | 7.78   | 10.19  | 31.45  | 10.28 | 6.77 |
| GFW1  | male | 14.58  | 16.08  | 16.22  | 20.54  | 17.07  | 15.53  | 14.13  | 14.50  | 14.79  | 15.95  | 14.06  | 18.05  | 14.68  | 22.50  | 11.28  | 10.65  | 11.63  | 8.32   | 10.92  | 34.55  | 13.08 | 7.42 |
| GFW20 | male | 12.56  | 13.49  | 14.30  | 17.89  | 14.33  | 12.75  | 11.62  | 12.14  | 12.56  | 13.24  | 11.21  | 14.73  | 11.55  | 20.03  | 9.06   | 8.52   | 9.93   | 6.81   | 9.34   | 31.17  | 12.45 | 6.43 |
| GFW22 | male | 12.75  | 13.52  | 14.50  | 18.76  | 14.83  | 13.11  | 12.02  | 12.32  | 12.86  | 13.71  | 11.78  | 15.23  | 12.55  | 20.19  | 9.83   | 8.90   | 10.74  | 7.21   | 10.20  | 32.35  | 10.34 | 6.59 |
| GFW25 | male | 12.67  | 13.56  | 13.85  | 17.30  | 14.71  | 13.41  | 12.29  | 12.70  | 12.93  | 14.06  | 12.67  | 16.47  | 13.03  | 22.67  | 10.24  | 10.61  | 11.50  | 8.14   | 10.28  | 32.56  | 9.05  | 6.73 |
| GFW26 | male | 14.12  | 14.78  | 15.90  | 19.78  | 16.26  | 14.37  | 13.11  | 13.49  | 14.23  | 14.91  | 12.88  | 16.96  | 13.36  | 19.86  | 9.89   | 10.18  | 12.04  | 8.32   | 10.74  | 34.14  | 10.12 | 7.06 |
| GFW28 | male | 12.27  | 13.09  | 13.85  | 17.13  | 13.98  | 12.54  | 11.41  | 11.77  | 12.45  | 12.96  | 10.90  | 13.58  | 10.88  | 19.77  | 8.92   | 8.22   | 10.04  | 6.64   | 9.00   | 28.72  | 8.94  | 6.31 |
| GFW31 | male | 13.82  | 14.38  | 15.97  | 20.02  | 15.94  | 13.93  | 12.58  | 12.96  | 13.77  | 14.30  | 11.84  | 15.03  | 11.99  | 21.37  | 9.81   | 8.66   | 10.75  | 6.97   | 10.23  | 34.28  | 11.40 | 7.04 |
| GFW32 | male | 11.25  | 12.23  | 12.57  | 15.56  | 12.97  | 11.38  | 10.42  | 10.90  | 11.41  | 11.85  | 10.10  | 13.78  | 10.89  | 18.07  | 8.51   | 8.44   | 9.69   | 6.49   | 8.80   | 33.58  | 8.67  | 5.89 |
| GFW34 | male | 13.04  | 13.90  | 14.51  | 18.13  | 15.13  | 13.76  | 12.47  | 12.89  | 13.35  | 14.19  | 12.69  | 15.63  | 12.27  | 20.10  | 10.16  | 9.61   | 10.72  | 7.48   | 10.39  | 32.79  | 7.07  | 6.89 |
| GFW37 | male | 11.63  | 12.40  | 12.88  | 16.32  | 13.39  | 12.10  | 11.04  | 11.36  | 11.80  | 12.58  | 10.90  | 14.25  | 11.39  | 19.74  | 8.40   | 9.07   | 10.81  | 7.49   | 8.85   | 30.10  | 14.25 | 6.13 |
| GFW38 | male | 16.18  | 17.40  | 18.47  | 23.75  | 18.79  | 16.73  | 15.38  | 15.90  | 16.47  | 17.43  | 15.11  | 19.65  | 15.63  | 24.87  | 13.07  | 11.89  | 14.39  | 10.64  | 12.90  | 42.87  | 7.17  | 8.21 |
| GFW3  | male | 12.86  | 13.39  | 14.00  | 17.05  | 14.50  | 13.08  | 12.04  | 12.47  | 12.95  | 13.66  | 11.70  | 14.46  | 12.00  | 19.83  | 9.61   | 9.03   | 10.42  | 7.21   | 9.78   | 26.72  | 10.74 | 6.59 |
| GFW40 | male | 14.90  | 15.85  | 16.81  | 21.10  | 17.64  | 15.54  | 14.03  | 14.56  | 15.42  | 16.09  | 13.94  | 17.75  | 14.48  | 23.76  | 11.37  | 10.97  | 12.51  | 8.61   | 11.72  | 39.08  | 11.55 | 7.75 |
| GFW41 | male | 12.19  | 12.96  | 13.89  | 17.56  | 14.26  | 12.58  | 11.48  | 11.96  | 12.45  | 13.07  | 10.96  | 14.36  | 11.32  | 22.06  | 9.80   | 8.69   | 11.12  | 7.56   | 9.63   | 33.68  | 8.46  | 6.42 |
| GFW42 | male | 11.68  | 12.29  | 13.23  | 16.40  | 13.50  | 11.99  | 10.82  | 11.20  | 11.63  | 12.32  | 10.68  | 13.06  | 10.93  | 19.90  | 8.92   | 8.20   | 9.65   | 6.53   | 8.85   | 29.69  | 7.98  | 6.06 |
| GFW43 | male | 14.26  | 15.47  | 16.14  | 20.25  | 16.38  | 14.85  | 13.66  | 14.14  | 14.45  | 15.49  | 13.45  | 16.87  | 13.65  | 24.35  | 11.06  | 10.38  | 12.09  | 8.61   | 11.02  | 35.30  | 9.05  | 7.41 |
| GFW44 | male | 13.14  | 13.88  | 14.75  | 18.67  | 15.78  | 13.89  | 12.48  | 13.01  | 13.45  | 14.34  | 12.52  | 15.33  | 12.52  | 21.42  | 10.77  | 9.82   | 11.97  | 8.34   | 10.74  | 34.64  | 9.21  | 7.11 |
| GFW48 | male | 11.98  | 12.64  | 13.52  | 16.70  | 13.93  | 12.32  | 11.14  | 11.50  | 12.16  | 12.66  | 11.07  | 14.24  | 11.31  | 19.49  | 8.61   | 8.33   | 9.58   | 6.59   | 9.09   | 32.79  | 9.60  | 6.35 |
| GFW49 | male | 12.94  | 13.51  | 15.07  | 19.56  | 15.10  | 13.33  | 12.13  | 12.60  | 12.95  | 13.62  | 11.98  | 14.79  | 12.51  | 19.32  | 9.54   | 9.26   | 11.23  | 7.51   | 10.11  | 32.17  | 10.11 | 6.71 |
| GFW4  | male | 13.65  | 14.61  | 15.38  | 19.03  | 15.77  | 14.19  | 12.81  | 13.15  | 13.90  | 14.62  | 12.40  | 16.41  | 12.83  | 23.02  | 10.61  | 9.60   | 11.10  | 7.68   | 10.42  | 32.83  | 7.50  | 6.96 |
| GFW50 | male | 13.48  | 14.21  | 14.91  | 18.77  | 15.68  | 14.12  | 12.89  | 13.36  | 13.83  | 14.83  | 13.21  | 16.41  | 13.19  | 21.75  | 11.27  | 10.38  | 12.01  | 8.60   | 10.71  | 32.78  | 8.77  | 6.92 |
| GFW6  | male | 15.60  | 16.91  | 17.82  | 22.19  | 18.18  | 16.07  | 14.60  | 15.08  | 15.70  | 16.48  | 13.97  | 17.16  | 14.38  | 25.08  | 11.15  | 11.06  | 13.01  | 9.45   | 11.38  | 40.32  | 10.51 | 7.91 |
| LHW4  | male | 11.42  | 12.57  | 12.93  | 16.42  | 13.57  | 12.13  | 11.04  | 11.42  | 11.84  | 12.36  | 10.94  | 13.44  | 10.58  | 17.90  | 8.63   | 7.72   | 9.66   | 6.65   | 8.72   | 25.84  | 9.19  | 5.85 |
| LHW13 | male | 10.59  | 11.35  | 11.60  | 14.28  | 12.10  | 10.71  | 9.82   | 10.29  | 10.81  | 11.11  | 9.68   | 12.40  | 9.47   | 17.24  | 7.71   | 6.97   | 9.62   | 6.42   | 8.10   | 26.49  | 12.35 | 5.52 |
| LXW15 | male | 12.26  | 13.15  | 13.80  | 17.62  | 14.43  | 12.82  | 11.51  | 12.03  | 12.45  | 13.34  | 11.34  | 14.24  | 11.57  | 17.25  | 9.50   | 9.37   | 10.95  | 7.24   | 9.47   | 30.62  | 11.77 | 6.44 |
| LXW17 | male | 13.57  | 14.68  | 15.08  | 18.97  | 16.17  | 14.09  | 12.58  | 13.28  | 13.97  | 14.82  | 12.67  | 16.90  | 14.50  | 19.09  | 10.25  | 9.52   | 11.36  | 7.79   | 10.52  | 36.74  | 11.96 | 7.21 |
| LXW18 | male | 14.17  | 15.39  | 16.86  | 22.82  | 18.05  | 14.63  | 13.16  | 13.65  | 15.03  | 16.22  | 13.14  | 17.54  | 18.28  | 21.03  | 12.09  | 11.22  | 13.24  | 8.94   | 11.65  | 38.26  | 10.17 | 7.61 |
| LXW19 | male | 14.26  | 15.24  | 15.55  | 18.95  | 16.18  | 14.75  | 13.53  | 14.02  | 14.52  | 15.15  | 13.36  | 16.42  | 12.42  | 22.98  | 10.73  | 9.42   | 12.13  | 8.52   | 11.21  | 34.86  | 11.69 | 7.17 |
| LXW1  | male | 12.03  | 12.60  | 13.68  | 16.78  | 13.80  | 12.39  | 11.38  | 11.58  | 11.95  | 12.39  | 10.49  | 13.10  | 9.90   | 13.99  | 7.70   | 7.03   | 8.54   | 5.72   | 8.40   | 27.04  | 10.32 | 5.98 |
| LXW21 | male | 10.84  | 11.62  | 12.60  | 16.68  | 12.93  | 11.35  | 10.42  | 10.82  | 11.15  | 12.02  | 10.77  | 14.10  | 10.83  | 16.23  | 8.73   | 7.74   | 10.21  | 7.11   | 8.74   | 26.03  | 10.78 | 5.76 |
| LXW26 | male | 13.13  | 14.55  | 15.16  | 19.28  | 15.53  | 13.53  | 12.11  | 12.68  | 13.53  | 14.15  | 11.81  | 15.68  | 13.20  | 21.39  | 9.85   | 9.59   | 11.45  | 7.51   | 10.30  | 35.72  | 8.65  | 6.74 |
| LXW28 | male | 12.84  | 13.46  | 15.27  | 18.90  | 14.88  | 12.96  | 11.78  | 12.14  | 12.89  | 13.09  | 10.97  | 13.59  | 10.09  | 18.08  | 8.46   | 7.86   | 10.15  | 6.84   | 8.91   | 32.53  | 10.48 | 6.42 |
| LXW30 | male | 11.00  | 11.38  | 12.37  | 15.10  | 12.58  | 11.11  | 10.02  | 10.34  | 11.06  | 11.29  | 9.80   | 12.50  | 9.29   | 16.93  | 8.57   | 7.27   | 9.35   | 6.14   | 8.25   | 28.33  | 9.95  | 5.73 |
| LXW33 | male | 11.54  | 12.57  | 13.61  | 17.59  | 14.07  | 12.02  | 10.88  | 11.21  | 12.11  | 12.71  | 11.07  | 15.01  | 12.44  | 19.68  | 9.09   | 8.78   | 10.58  | 7.29   | 9.39   | 31.55  | 6.88  | 6.23 |
| LXW35 | male | 11.98  | 13.07  | 13.97  | 18.55  | 14.28  | 12.53  | 11.61  | 12.09  | 12.27  | 13.38  | 12.08  | 15.20  | 12.61  | 22.52  | 9.88   | 9.59   | 11.97  | 8.61   | 10.02  | 32.75  | 10.96 | 6.39 |
| LXW38 | male | 12.66  | 13.46  | 13.87  | 17.50  | 14.79  | 13.43  | 12.20  | 12.71  | 12.92  | 14.07  | 12.84  | 16.03  | 12.84  | 19.07  | 10.90  | 9.61   | 11.96  | 8.51   | 10.60  | 33.61  | 9.35  | 6.64 |
| LXW39 | male | 12.93  | 13.88  | 14.55  | 18.55  | 15.15  | 13.77  | 12.51  | 13.05  | 13.33  | 14.30  | 13.00  | 15.22  | 12.77  | 19.18  | 10.41  | 10.27  | 12.46  | 9.00   | 10.48  | 34.17  | 8.15  | 6.68 |
| LXW41 | male | 14.27  | 15.55  | 15.98  | 19.16  | 15.87  | 14.71  | 13.69  | 14.22  | 14.21  | 15.19  | 13.48  | 15.29  | 11.56  | 19.55  | 10.65  | 9.03   | 12.60  | 8.74   | 11.15  | 35.18  | 11.36 | 7.05 |
| LXW45 | male | 14.75  | 15.52  | 16.40  | 20.35  | 17.28  | 15.67  | 14.19  | 14.71  | 15.21  | 16.55  | 14.50  | 17.72  | 14.45  | 20.39  | 11.36  | 10.47  | 13.58  | 9.79   | 12.03  | 37.79  | 8.56  | 7.45 |
| LXW47 | male | 12.31  | 13.43  | 14.22  | 18.17  | 14.36  | 12.97  | 12.03  | 12.53  | 12.53  | 13.56  | 12.19  | 14.85  | 11.53  | 17.43  | 10.47  | 8.42   | 11.84  | 8.52   | 10.07  | 33.21  | 13.26 | 6.36 |
| LXW49 | male | 12.53  | 13.43  | 14.52  | 18.54  | 14.41  | 13.15  | 12.10  | 12.59  | 12.73  | 13.50  | 12.21  | 15.12  | 11.14  | 16.60  | 9.08   | 8.82   | 12.06  | 8.45   | 9.74   | 29.45  | 12.98 | 6.39 |
| LXW4  | male | 13.75  | 15.05  | 15.39  | 18.67  | 15.82  | 14.17  | 12.89  | 13.43  | 13.99  | 14.76  | 12.59  | 16.08  | 12.87  | 21.04  | 9.77   | 10.54  | 11.80  | 7.85   | 10.66  | 33.43  | 10.24 | 7.11 |
| LXW50 | male | 13.74  | 14.88  | 14.82  | 18.70  | 15.89  | 14.53  | 13.32  | 13.77  | 14.16  | 15.35  | 13.76  | 17.01  | 14.95  | 21.21  | 11.36  | 10.93  | 13.31  | 9.79   | 11.28  | 37.14  | 11.74 | 7.32 |
| LXW6  | male | 13.58  | 14.50  | 15.21  | 19.14  | 15.54  | 14.00  | 12.91  | 13.38  | 13.77  | 14.64  | 12.83  | 16.16  | 12.90  | 20.57  | 10.45  | 9.03   | 12.13  | 8.77   | 10.69  | 34.72  | 9.26  | 7.01 |
| LXW9  | male | 15.24  | 15.95  | 17.14  | 21.00  | 17.13  | 15.32  | 13.98  | 14.34  | 15.10  | 15.60  | 13.14  | 16.30  | 12.81  | 21.18  | 9.67   | 8.59   | 11.15  | 7.49   | 10.46  | 36.79  | 9.74  | 7.68 |

307 **Supplementary Table 16.** Genome assemblies used for gene families and phylogenetic  
 308 analysis.

| Common name                       | Species                      | Genus            | Family             | Assembly        |
|-----------------------------------|------------------------------|------------------|--------------------|-----------------|
| Xingguo gray goose                | <i>Anser cygnoides</i>       | <i>Anser</i>     | <i>Anatidae</i>    | This study      |
| Tianfu goose <sup>47</sup>        | <i>Anser cygnoides</i>       | <i>Anser</i>     | <i>Anatidae</i>    | GCA_013030995.1 |
| Zhedong white goose <sup>48</sup> | <i>Anser cygnoides</i>       | <i>Anser</i>     | <i>Anatidae</i>    | GCF_000971095.1 |
| Sichuan white goose <sup>49</sup> | <i>Anser cygnoides</i>       | <i>Anser</i>     | <i>Anatidae</i>    | GCA_002166845.1 |
| Mallard <sup>63</sup>             | <i>Anas platyrhynchos</i>    | <i>Anas</i>      | <i>Anatidae</i>    | GCA_008746955.1 |
| Eastern spot-billed duck          | <i>Anas zonorhyncha</i>      | <i>Anas</i>      | <i>Anatidae</i>    | GCA_002224875.1 |
| Pekin duck <sup>40</sup>          | <i>Anas platyrhynchos</i>    | <i>Anas</i>      | <i>Anatidae</i>    | GCA_003850225.1 |
| Tufted duck                       | <i>Aythya fuligula</i>       | <i>Aythya</i>    | <i>Anatidae</i>    | GCF_009819795.1 |
| Muscovy duck                      | <i>Cairina moschata</i>      | <i>Cairina</i>   | <i>Anatidae</i>    | GCA_009194515.1 |
| Ruddy duck                        | <i>Oxyura jamaicensis</i>    | <i>Oxyura</i>    | <i>Anatidae</i>    | GCF_011077185.1 |
| Pink-footed goose <sup>51</sup>   | <i>Anser brachyrhynchus</i>  | <i>Anser</i>     | <i>Anatidae</i>    | GCA_002592135.1 |
| Black swan                        | <i>Cygnus atratus</i>        | <i>Cygnus</i>    | <i>Anatidae</i>    | GCF_013377495.1 |
| Magpie goose <sup>64</sup>        | <i>Anseranas semipalmata</i> | <i>Anseranas</i> | <i>Anatidae</i>    | GCA_013399115.1 |
| Turkey <sup>53</sup>              | <i>Meleagris gallopavo</i>   | <i>Meleagris</i> | <i>Phasianidae</i> | GCF_000146605.3 |
| Chicken <sup>52</sup>             | <i>Gallus gallus</i>         | <i>Gallus</i>    | <i>Phasianidae</i> | GCF_000002315.6 |

309 Note: Shaed species are used for phylogenetic analysis.

310

311

312

313 **Supplementary Table 17.** GO analysis for the lineage-specific gene families in XGG  
 314 compared to TFG, SCW and ZDW.

| GO term    | Category               | Function            | p-value  |
|------------|------------------------|---------------------|----------|
| GO:0005869 | GO Cellular Components | dynactin complex    | 3.53E-13 |
| GO:0005884 | GO Cellular Components | actin filament      | 1.28E-10 |
| GO:0030137 | GO Cellular Components | COPI-coated vesicle | 8.59E-07 |
| GO:0005925 | GO Cellular Components | focal adhesion      | 7.09E-06 |
| GO:0005938 | GO Cellular Components | cell cortex         | 1.09E-03 |

315

| <b>GO term</b> | <b>Category</b>         | <b>Function</b>                                                             | <b>p-value</b> |
|----------------|-------------------------|-----------------------------------------------------------------------------|----------------|
| GO:0005005     | GO Molecular Functions  | transmembrane-ephrin receptor activity                                      | 1.80E-16       |
| GO:0035637     | GO Biological Processes | multicellular organismal signaling                                          | 4.67E-09       |
| GO:0016309     | GO Molecular Functions  | 1-phosphatidylinositol-5-phosphate 4-kinase activity                        | 2.09E-07       |
| GO:0030424     | GO Cellular Components  | axon                                                                        | 3.47E-07       |
| GO:1902495     | GO Cellular Components  | transmembrane transporter complex                                           | 5.85E-07       |
| GO:0090625     | GO Biological Processes | mRNA cleavage involved in gene silencing by siRNA                           | 8.30E-07       |
| GO:0044420     | GO Cellular Components  | extracellular matrix component                                              | 9.37E-07       |
| GO:0046718     | GO Biological Processes | viral entry into host cell                                                  | 1.58E-06       |
| GO:0044449     | GO Cellular Components  | contractile fiber part                                                      | 8.58E-06       |
| GO:0045322     | GO Molecular Functions  | unmethylated CpG binding                                                    | 1.14E-05       |
| GO:0000139     | GO Cellular Components  | Golgi membrane                                                              | 1.54E-05       |
| GO:0042541     | GO Biological Processes | hemoglobin biosynthetic process                                             | 2.43E-05       |
| GO:0030900     | GO Biological Processes | forebrain development                                                       | 2.53E-05       |
| GO:0016594     | GO Molecular Functions  | glycine binding                                                             | 7.23E-05       |
| GO:0046982     | GO Molecular Functions  | protein heterodimerization activity                                         | 1.41E-04       |
| GO:0016607     | GO Cellular Components  | nuclear speck                                                               | 1.57E-04       |
| GO:0007157     | GO Biological Processes | heterophilic cell-cell adhesion via plasma membrane cell adhesion molecules | 1.78E-04       |
| GO:0030246     | GO Molecular Functions  | carbohydrate binding                                                        | 2.12E-04       |
| GO:0001525     | GO Biological Processes | angiogenesis                                                                | 3.20E-04       |
| GO:0031589     | GO Biological Processes | cell-substrate adhesion                                                     | 3.28E-04       |
| GO:0005509     | GO Molecular Functions  | calcium ion binding                                                         | 3.63E-04       |
| GO:0006907     | GO Biological Processes | pinocytosis                                                                 | 3.85E-04       |
| GO:0007628     | GO Biological Processes | adult walking behavior                                                      | 5.49E-04       |
| GO:0002230     | GO Biological Processes | positive regulation of defense response to virus by host                    | 6.80E-04       |
| GO:1904019     | GO Biological Processes | epithelial cell apoptotic process                                           | 7.80E-04       |
| GO:0005930     | GO Cellular Components  | axoneme                                                                     | 8.72E-04       |
| GO:0009611     | GO Biological Processes | response to wounding                                                        | 1.16E-03       |
| GO:0097190     | GO Biological Processes | apoptotic signaling pathway                                                 | 1.17E-03       |

318 **Supplementary Table 18.** GO analysis for the significant expansion gene families in XGG  
 319 (Continued).

| <b>GO term</b> | <b>Category</b>         | <b>Function</b>                                                       | <b>p-value</b> |
|----------------|-------------------------|-----------------------------------------------------------------------|----------------|
| GO:0120035     | GO Biological Processes | regulation of plasma membrane<br>bounded cell projection organization | 1.37E-03       |
| GO:0001540     | GO Molecular Functions  | amyloid-beta binding                                                  | 1.42E-03       |
| GO:0032386     | GO Biological Processes | regulation of intracellular transport                                 | 1.45E-03       |
| GO:0019932     | GO Biological Processes | second-messenger-mediated signaling                                   | 1.74E-03       |
| GO:0005912     | GO Cellular Components  | adherens junction                                                     | 1.89E-03       |
| GO:0042063     | GO Biological Processes | gliogenesis                                                           | 2.54E-03       |
| GO:0006303     | GO Biological Processes | double-strand break repair via<br>nonhomologous end joining           | 3.07E-03       |
| GO:1990778     | GO Biological Processes | protein localization to cell periphery                                | 4.03E-03       |
| GO:0098900     | GO Biological Processes | regulation of action potential                                        | 4.82E-03       |
| GO:0030155     | GO Biological Processes | regulation of cell adhesion                                           | 4.91E-03       |
| GO:0009991     | GO Biological Processes | response to extracellular stimulus                                    | 5.80E-03       |
| GO:0031646     | GO Biological Processes | positive regulation of neurological<br>system process                 | 6.95E-03       |

320

321 **Supplementary Table 19.** Overlapping genes identified by zFst between white and gray  
 322 geese and zHp in white geese.

| <b>Chromosome</b> | <b>zFst</b> | <b>zHp</b> | <b>Gene_Start</b> | <b>Gene_End</b> | <b>Gene_Name</b> |
|-------------------|-------------|------------|-------------------|-----------------|------------------|
| 15                | 11.23       | -3.84      | 15,758,873        | 15,772,560      | <i>EDNRB2</i>    |
| 15                | 11.23       | -3.84      | 15,773,733        | 15,779,279      | <i>POLR1D</i>    |
| 2                 | 10.05       | -3.40      | 18,809,517        | 18,832,692      | <i>EIF3E</i>     |
| 38                | 6.72        | -3.44      | 38,080,915        | 38,141,883      | <i>AGTPBP1</i>   |
| 38                | 6.39        | -3.62      | 66,751,352        | 66,789,274      | <i>CSPG4</i>     |
| 2                 | 5.98        | -3.73      | 18,858,633        | 18,911,400      | <i>RSPO2</i>     |
| 38                | 5.74        | -4.13      | 66,642,732        | 66,664,363      | <i>SNX18</i>     |
| 6                 | 5.59        | -3.66      | 17,455,295        | 17,593,698      | <i>TTC7B</i>     |
| 5                 | 5.08        | -3.46      | 32,077,378        | 32,166,339      | <i>PTPN13</i>    |
| 38                | 4.86        | -4.24      | 23,725,129        | 23,779,550      | <i>ZNF462</i>    |
| 38                | 4.51        | -4.21      | 24,165,321        | 24,181,476      | <i>TMEM38B-B</i> |
| 3                 | 4.48        | -3.44      | 67,976,648        | 68,050,654      | <i>SYNE1</i>     |
| 19                | 3.63        | -3.24      | 5,397,937         | 5,422,453       | <i>TOM1L1</i>    |

323



324 **Supplementary Table 20.** Frequency of the 14-bp insertion in wild, white, and gray goose  
 325 populations.

| Breeds (plumage color)             | Total number | Genotype (Genotype frequency) |         |          |
|------------------------------------|--------------|-------------------------------|---------|----------|
|                                    |              | +/+                           | +/wt    | wt/wt    |
| <i>Anser albifrons</i> (gray)*     | 6            | 0(0)                          | 0(0)    | 6(1)     |
| <i>Anser anser</i> (gray)*         | 6            | 0(0)                          | 0(0)    | 6(1)     |
| <i>Anser cygnoides</i> (gray)*     | 59           | 0(0)                          | 0(0)    | 59(1)    |
| <i>Anser erythropus</i> (gray)*    | 6            | 0(0)                          | 0(0)    | 6(1)     |
| <i>Anser fabalis</i> (gray)*       | 6            | 0(0)                          | 0(0)    | 6(1)     |
| <i>Cygnus columbianus</i> (white)* | 6            | 0(0)                          | 0(0)    | 6(1)     |
| Fengcheng gray goose (gray)        | 51           | 0(0)                          | 4(0.08) | 47(0.92) |
| Shitou goose (gray)                | 100          | 0(0)                          | 0(0)    | 100(1)   |
| Wuzong goose (gray)                | 100          | 0(0)                          | 0(0)    | 100(1)   |
| Xingguo gray goose (gray)          | 60           | 0(0)                          | 0(0)    | 60(1)    |
| Landaise goose (gray)              | 50           | 0(0)                          | 0(0)    | 50(1)    |
| Guangfeng white goose (white)      | 50           | 50(1)                         | 0(0)    | 0(0)     |
| Huoyan goose (white)               | 60           | 60(1)                         | 0(0)    | 0(0)     |
| Lianhua white goose (white)        | 11           | 11(1)                         | 0(0)    | 0(0)     |
| Linxian white goose (white)        | 50           | 50(1)                         | 0(0)    | 0(0)     |
| Mingbei white goose (white)        | 51           | 51(1)                         | 0(0)    | 0(0)     |

326 Note: \* represents wild population; + represents 14-bp insertion and wt represents wild-type.

327 **Supplementary Table 21.** The variants with extremely significant allele frequencies in  
 328 wild, white, and gray geese.

| CHR | Position | Alternative allele  | Reference allele | Gene   | description                                                                | Cluster | MAF    | MAC | Number of alleles |
|-----|----------|---------------------|------------------|--------|----------------------------------------------------------------------------|---------|--------|-----|-------------------|
| 15  | 15763328 | G                   | A                | EDNRB2 | intronic                                                                   | Anser   | 0.2349 | 39  | 166               |
|     |          |                     |                  |        |                                                                            | Cygnus  | 1      | 12  | 12                |
|     |          |                     |                  |        |                                                                            | Gray    | 0.0429 | 31  | 722               |
|     |          |                     |                  |        |                                                                            | White   | 1      | 444 | 444               |
| 15  | 15763384 | G                   | C                | EDNRB2 | intronic                                                                   | Anser   | 0.3976 | 66  | 166               |
|     |          |                     |                  |        |                                                                            | Cygnus  | 0      | 0   | 12                |
|     |          |                     |                  |        |                                                                            | Gray    | 0.0055 | 4   | 722               |
|     |          |                     |                  |        |                                                                            | White   | 1      | 444 | 444               |
| 15  | 15764237 | G                   | C                | EDNRB2 | intronic                                                                   | Anser   | 0.1867 | 31  | 166               |
|     |          |                     |                  |        |                                                                            | Cygnus  | 0      | 0   | 12                |
|     |          |                     |                  |        |                                                                            | Gray    | 0.0152 | 11  | 722               |
|     |          |                     |                  |        |                                                                            | White   | 1      | 444 | 444               |
| 15  | 15764499 | A                   | G                | EDNRB2 | intronic                                                                   | Anser   | 0.0783 | 13  | 166               |
|     |          |                     |                  |        |                                                                            | Cygnus  | 1      | 12  | 12                |
|     |          |                     |                  |        |                                                                            | Gray    | 0.0055 | 4   | 722               |
|     |          |                     |                  |        |                                                                            | White   | 1      | 444 | 444               |
| 15  | 15764637 | GCACAGGT<br>GAGCTCT | G                | EDNRB2 | Frameshift insertion,<br>exon3:c.602_603insCA<br>CAGGTGAGCTCT:p.S<br>201fs | Anser   | 0      | 0   | 166               |
|     |          |                     |                  |        |                                                                            | Cygnus  | 0      | 0   | 12                |
|     |          |                     |                  |        |                                                                            | Gray    | 0.0055 | 4   | 722               |
|     |          |                     |                  |        |                                                                            | White   | 1      | 444 | 444               |
| 15  | 15765937 | C                   | A                | EDNRB2 | intronic                                                                   | Anser   | 0.0301 | 5   | 166               |
|     |          |                     |                  |        |                                                                            | Cygnus  | 0      | 0   | 12                |
|     |          |                     |                  |        |                                                                            | Gray    | 0.0055 | 4   | 722               |
|     |          |                     |                  |        |                                                                            | White   | 0.9932 | 441 | 444               |
| 15  | 15765943 | G                   | A                | EDNRB2 | intronic                                                                   | Anser   | 0.1325 | 22  | 166               |
|     |          |                     |                  |        |                                                                            | Cygnus  | 0.5    | 6   | 12                |
|     |          |                     |                  |        |                                                                            | Gray    | 0.0402 | 29  | 722               |
|     |          |                     |                  |        |                                                                            | White   | 0.9932 | 441 | 444               |
| 15  | 15765978 | T                   | G                | EDNRB2 | intronic                                                                   | Anser   | 0.0301 | 5   | 166               |
|     |          |                     |                  |        |                                                                            | Cygnus  | 0      | 0   | 12                |
|     |          |                     |                  |        |                                                                            | Gray    | 0.0402 | 29  | 722               |
|     |          |                     |                  |        |                                                                            | White   | 0.9932 | 441 | 444               |
| 15  | 15765994 | T                   | C                | EDNRB2 | intronic                                                                   | Anser   | 0.0422 | 7   | 166               |
|     |          |                     |                  |        |                                                                            | Cygnus  | 0      | 0   | 12                |
|     |          |                     |                  |        |                                                                            | Gray    | 0.0402 | 29  | 722               |
|     |          |                     |                  |        |                                                                            | White   | 0.9932 | 441 | 444               |
| 15  | 15766491 | C                   | T                | EDNRB2 | intronic                                                                   | Anser   | 0.3735 | 62  | 166               |
|     |          |                     |                  |        |                                                                            | Cygnus  | 0      | 0   | 12                |
|     |          |                     |                  |        |                                                                            | Gray    | 0.0152 | 11  | 722               |
|     |          |                     |                  |        |                                                                            | White   | 0.991  | 440 | 444               |
| 15  | 15766502 | T                   | C                | EDNRB2 | intronic                                                                   | Anser   | 0.3253 | 54  | 166               |

|    |          |   |   |               |                  |        |        |     |     |
|----|----------|---|---|---------------|------------------|--------|--------|-----|-----|
|    |          |   |   |               |                  | Cygnus | 0      | 0   | 12  |
|    |          |   |   |               |                  | Gray   | 0.0055 | 4   | 722 |
|    |          |   |   |               |                  | White  | 0.9887 | 439 | 444 |
|    |          |   |   |               |                  | Anser  | 0.0241 | 4   | 166 |
| 15 | 15767006 | A | G | <i>EDNRB2</i> | intronic         | Cygnus | 0      | 0   | 12  |
|    |          |   |   |               |                  | Gray   | 0.0083 | 6   | 722 |
|    |          |   |   |               |                  | White  | 0.964  | 428 | 444 |
|    |          |   |   |               |                  | Anser  | 0.0783 | 13  | 166 |
| 15 | 15767117 | A | G | <i>EDNRB2</i> | intronic         | Cygnus | 0      | 0   | 12  |
|    |          |   |   |               |                  | Gray   | 0.0055 | 4   | 722 |
|    |          |   |   |               |                  | White  | 0.9865 | 438 | 444 |
|    |          |   |   |               |                  | Anser  | 0.5241 | 87  | 166 |
| 15 | 15767847 | G | A | <i>EDNRB2</i> | intronic         | Cygnus | 1      | 12  | 12  |
|    |          |   |   |               |                  | Gray   | 0.0263 | 19  | 722 |
|    |          |   |   |               |                  | White  | 0.9887 | 439 | 444 |
|    |          |   |   |               |                  | Anser  | 0.0301 | 5   | 166 |
| 15 | 15769453 | T | C | <i>EDNRB2</i> | UTR3, c.*850C>T  | Cygnus | 0      | 0   | 12  |
|    |          |   |   |               |                  | Gray   | 0.0139 | 10  | 722 |
|    |          |   |   |               |                  | White  | 0.9617 | 427 | 444 |
|    |          |   |   |               |                  | Anser  | 0.0301 | 5   | 166 |
| 15 | 15769504 | C | T | <i>EDNRB2</i> | UTR3, c.*901T>C  | Cygnus | 0      | 0   | 12  |
|    |          |   |   |               |                  | Gray   | 0.0319 | 23  | 722 |
|    |          |   |   |               |                  | White  | 0.9685 | 430 | 444 |
|    |          |   |   |               |                  | Anser  | 0.0301 | 5   | 166 |
| 15 | 15769505 | A | G | <i>EDNRB2</i> | UTR3, c.*902G>A  | Cygnus | 0      | 0   | 12  |
|    |          |   |   |               |                  | Gray   | 0.0152 | 11  | 722 |
|    |          |   |   |               |                  | White  | 0.9617 | 427 | 444 |
|    |          |   |   |               |                  | Anser  | 0.0482 | 8   | 166 |
| 15 | 15769683 | A | G | <i>EDNRB2</i> | UTR3, c.*1080G>A | Cygnus | 0      | 0   | 12  |
|    |          |   |   |               |                  | Gray   | 0.0125 | 9   | 722 |
|    |          |   |   |               |                  | White  | 0.9595 | 426 | 444 |
|    |          |   |   |               |                  | Anser  | 0.0241 | 4   | 166 |
| 15 | 15770566 | T | C | <i>EDNRB2</i> | UTR3, c.*1963C>T | Cygnus | 0      | 0   | 12  |
|    |          |   |   |               |                  | Gray   | 0.0152 | 11  | 722 |
|    |          |   |   |               |                  | White  | 0.9842 | 437 | 444 |
|    |          |   |   |               |                  | Anser  | 0.4398 | 73  | 166 |
| 15 | 15770880 | G | A | <i>EDNRB2</i> | UTR3, c.*2277A>G | Cygnus | 1      | 12  | 12  |
|    |          |   |   |               |                  | Gray   | 0.0457 | 33  | 722 |
|    |          |   |   |               |                  | White  | 0.9887 | 439 | 444 |
|    |          |   |   |               |                  | Anser  | 0.0241 | 4   | 166 |
| 15 | 15775255 | A | G | <i>POLR1D</i> | intronic         | Cygnus | 0      | 0   | 12  |
|    |          |   |   |               |                  | Gray   | 0.0485 | 35  | 722 |
|    |          |   |   |               |                  | White  | 0.9865 | 438 | 444 |
|    |          |   |   |               |                  | Anser  | 0.0181 | 3   | 166 |
| 15 | 15777558 | T | G | <i>POLR1D</i> | intronic         | Cygnus | 0      | 0   | 12  |

|    |          |   |                  |               |          |        |        |     |     |
|----|----------|---|------------------|---------------|----------|--------|--------|-----|-----|
|    |          |   |                  |               |          | Gray   | 0.0471 | 34  | 722 |
|    |          |   |                  |               |          | White  | 0.982  | 436 | 444 |
| 15 | 15778568 | T | C                | <i>POLR1D</i> | intronic | Anser  | 0.3795 | 63  | 166 |
|    |          |   |                  |               |          | Cygnus | 1      | 12  | 12  |
|    |          |   |                  |               |          | Gray   | 0.0471 | 34  | 722 |
|    |          |   |                  |               |          | White  | 0.9707 | 431 | 444 |
|    |          |   |                  |               |          | Anser  | 0.3735 | 62  | 166 |
| 15 | 15778575 | A | G                | <i>POLR1D</i> | intronic | Cygnus | 1      | 12  | 12  |
|    |          |   |                  |               |          | Gray   | 0.0457 | 33  | 722 |
|    |          |   |                  |               |          | White  | 0.9685 | 430 | 444 |
| 15 | 15778592 | T | C                | <i>POLR1D</i> | intronic | Anser  | 0.3133 | 52  | 166 |
|    |          |   |                  |               |          | Cygnus | 0      | 0   | 12  |
|    |          |   |                  |               |          | Gray   | 0.0499 | 36  | 722 |
|    |          |   |                  |               |          | White  | 0.9595 | 426 | 444 |
| 15 | 15778959 | G | A                | <i>POLR1D</i> | intronic | Anser  | 0.2289 | 38  | 166 |
|    |          |   |                  |               |          | Cygnus | 0      | 0   | 12  |
|    |          |   |                  |               |          | Gray   | 0.0499 | 36  | 722 |
|    |          |   |                  |               |          | White  | 0.9707 | 431 | 444 |
| 15 | 15778991 | C | CCAGCG<br>CTGCTA | <i>POLR1D</i> | intronic | Anser  | 0.1747 | 29  | 166 |
|    |          |   |                  |               |          | Cygnus | 0      | 0   | 12  |
|    |          |   |                  |               |          | Gray   | 0.0499 | 36  | 722 |
|    |          |   |                  |               |          | White  | 0.9707 | 431 | 444 |

329 Note: MAF, minor allele frequency; MAC, minor allele count in cluster; Anser, ancestral populations and  
330 closely related species.

331 **Supplementary Table 22.** Overlapping genes identified by zFst between XGG and other  
 332 geese and zHp in XGG population.

| Chr | zFst      | zHp         | Gene_start | Gene_end  | Gene                  |
|-----|-----------|-------------|------------|-----------|-----------------------|
| 1   | 4.2423609 | -3.97783751 | 164365239  | 164387414 | <i>SLC5A8</i>         |
| 2   | 5.1030351 | -3.16406827 | 99128590   | 99194125  | <i>PPP1R17</i>        |
| 6   | 5.3002111 | -4.00008866 | 61246543   | 61396443  | <i>PLEKHA7</i>        |
| 9   | 3.6587609 | -5.16182216 | 17309730   | 17330843  | <i>Hic_asm_9.361</i>  |
| 15  | 4.4666206 | -4.32233659 | 16795527   | 16819262  | <i>CHIC1</i>          |
| 15  | 3.7679185 | -4.23615863 | 18373952   | 18475699  | <i>AMMECR1</i>        |
| 15  | 8.361944  | -3.95922    | 5804230    | 5991030   | <i>DIAPH2</i>         |
| 15  | 4.0971025 | -3.89774323 | 18486092   | 18530364  | <i>TMEM164</i>        |
| 15  | 5.0179989 | -3.15456429 | 16795527   | 16819262  | <i>CHIC1</i>          |
| 15  | 9.3826581 | -3.1264262  | 15758873   | 15772560  | <i>EDNRB</i>          |
| 16  | 3.9087894 | -3.12637206 | 11720364   | 11739084  | <i>LUC7L</i>          |
| 26  | 4.1295195 | -4.99522952 | 4635431    | 4640908   | <i>Hic_asm_26.322</i> |
| 28  | 4.1747604 | -3.88297635 | 5633672    | 5674798   | <i>MYO1F</i>          |
| 38  | 6.6557467 | -5.05047353 | 60381450   | 60398646  | <i>AGXT2</i>          |
| 38  | 4.8800648 | -4.96661217 | 59045958   | 59138210  | <i>CCBE1</i>          |
| 38  | 4.0933975 | -4.91338601 | 60410068   | 60430582  | <i>PRLR</i>           |
| 38  | 7.1068973 | -4.382922   | 38833035   | 38854797  | <i>FBP2</i>           |
| 38  | 6.1352576 | -4.22897146 | 38817894   | 38823677  | <i>CTSL</i>           |
| 38  | 5.4233538 | -4.04068453 | 60573405   | 60625640  | <i>SPEF2</i>          |
| 38  | 4.5662638 | -3.99617173 | 62224295   | 62249090  | <i>DAB2</i>           |
| 38  | 6.9723499 | -3.17589598 | 9001616    | 9192436   | <i>EDIL3</i>          |

333

334 **Supplementary Figures**

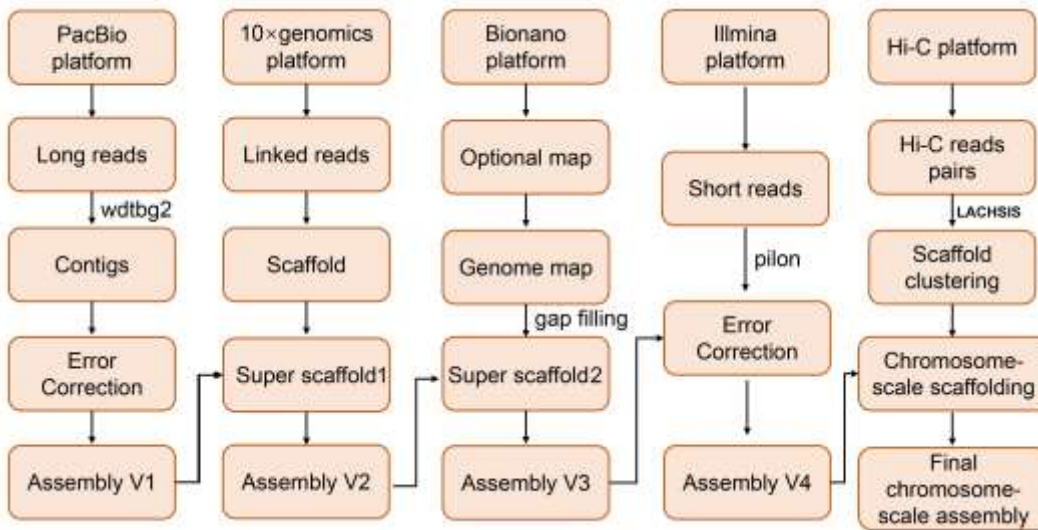

335  
 336 **Supplementary Figure 1.** The genome assembling flowchart of XGG in Novogene  
 337 Company.  
 338

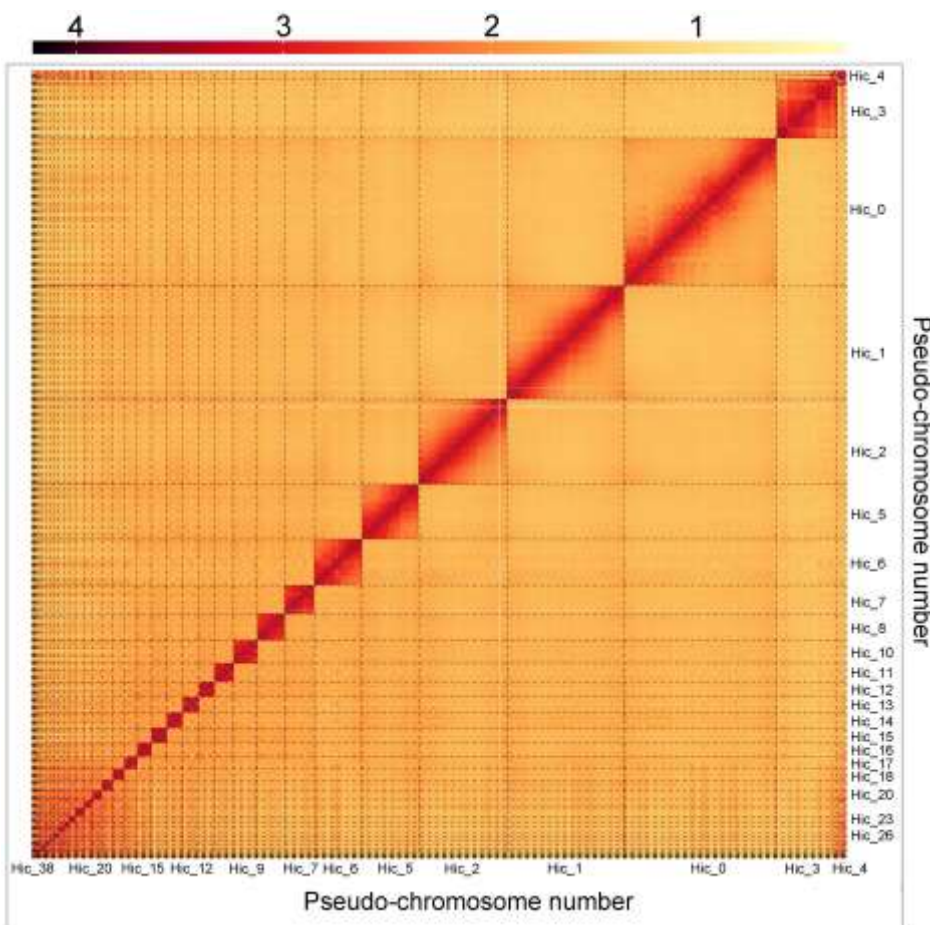

339  
 340 **Supplementary Figure 2.** The Hi-C interaction contact heatmap of goose pseudo-  
 341 chromosome genome assembly.  
 342

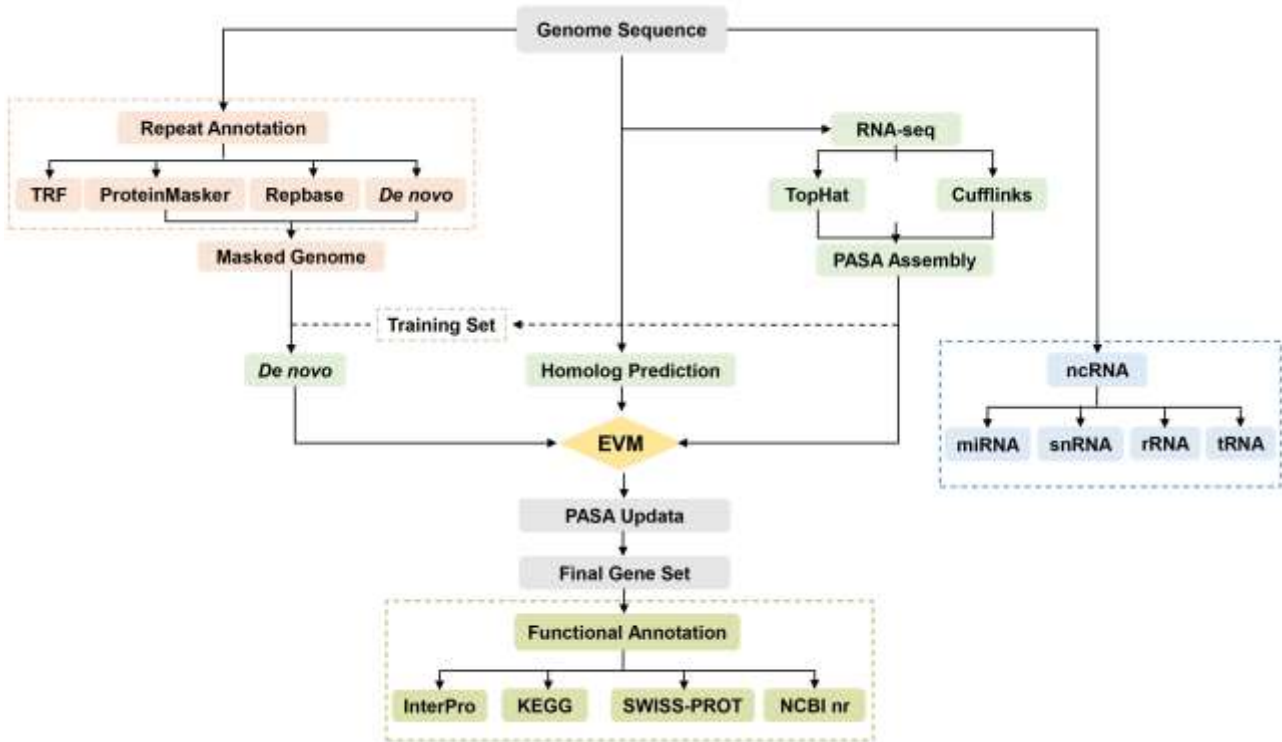

343  
344  
345  
346  
347  
348  
349

**Supplementary Figure 3.** The genome annotation pipeline of XGG genome in Novogene Company.

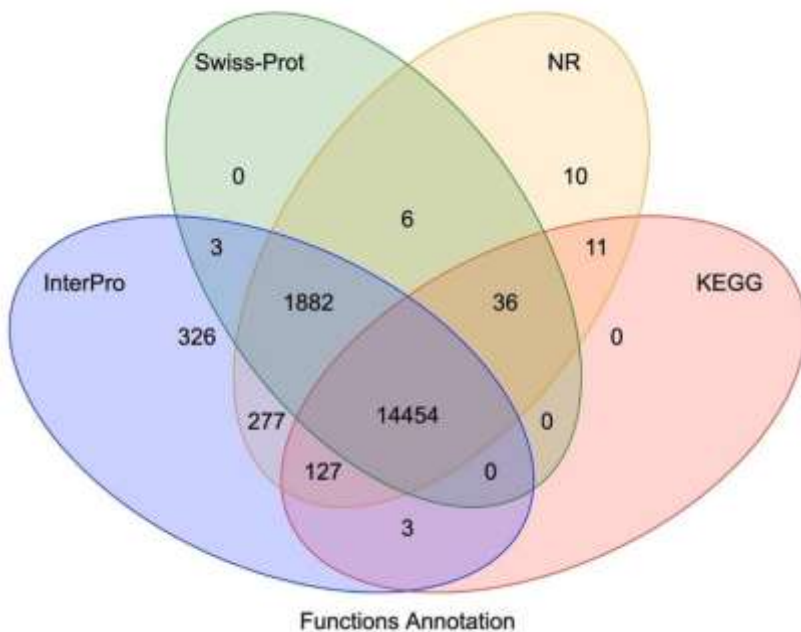

350  
351  
352

**Supplementary Figure 4.** Venn diagram of gene function annotation results of different protein databases.

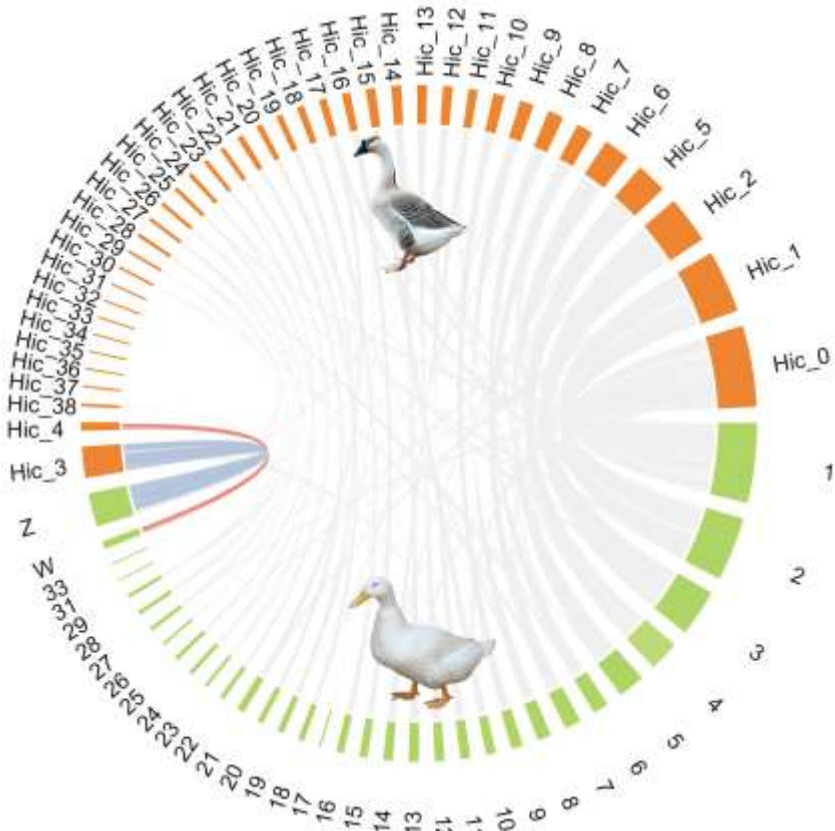

353

354 **Supplementary Figure 5.** The collinearity results between XGG and Pekin duck. The  
 355 orange and green blocks represent the chromosomes of XGG and Pekin duck,  
 356 respectively.



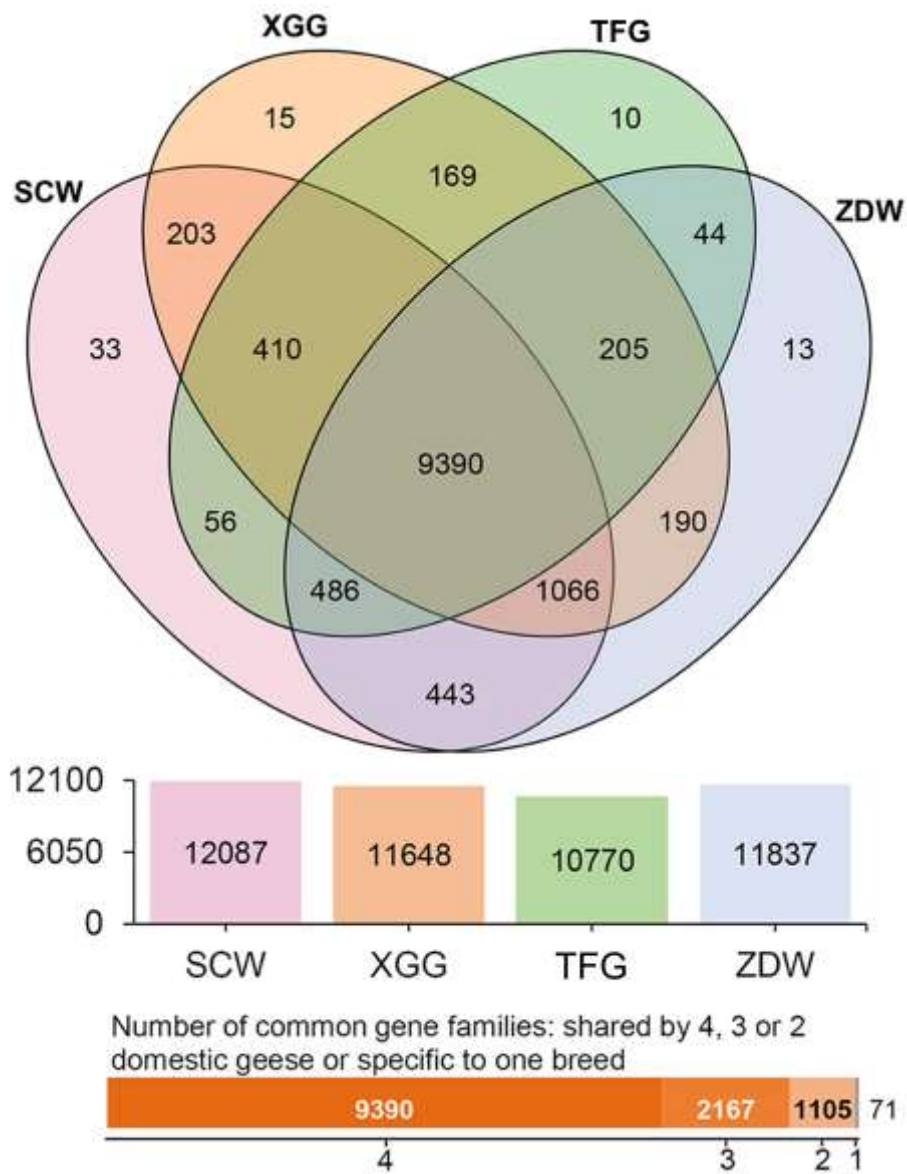

357

358 **Supplementary Figure 6.** The number of shared and unique gene families among four  
 359 domestic geese. SCW, Sichuan white goose; XGG, Xingguo gray goose; TFG, Tianfu goose;  
 360 ZDW, Zhedong white goose.

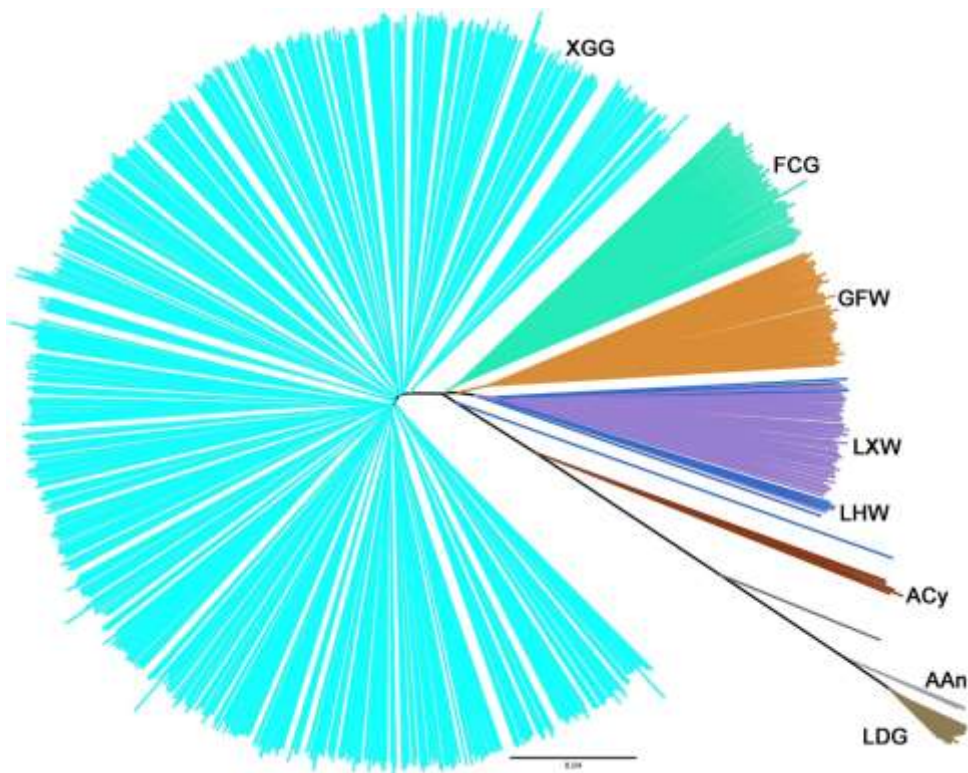

361

362 **Supplementary Figure 7.** Neighbor-joining tree of 845 geese. XGG, Xingguo gray goose;  
 363 FCG, Fengcheng gray goose; GFW, Guangfeng white goose; LXW, Lingxian white goose;  
 364 LHW, Lianhua white goose; ACy, Swan goose; AAn, Greylag goose; LDG, Landaise goose.

365

366

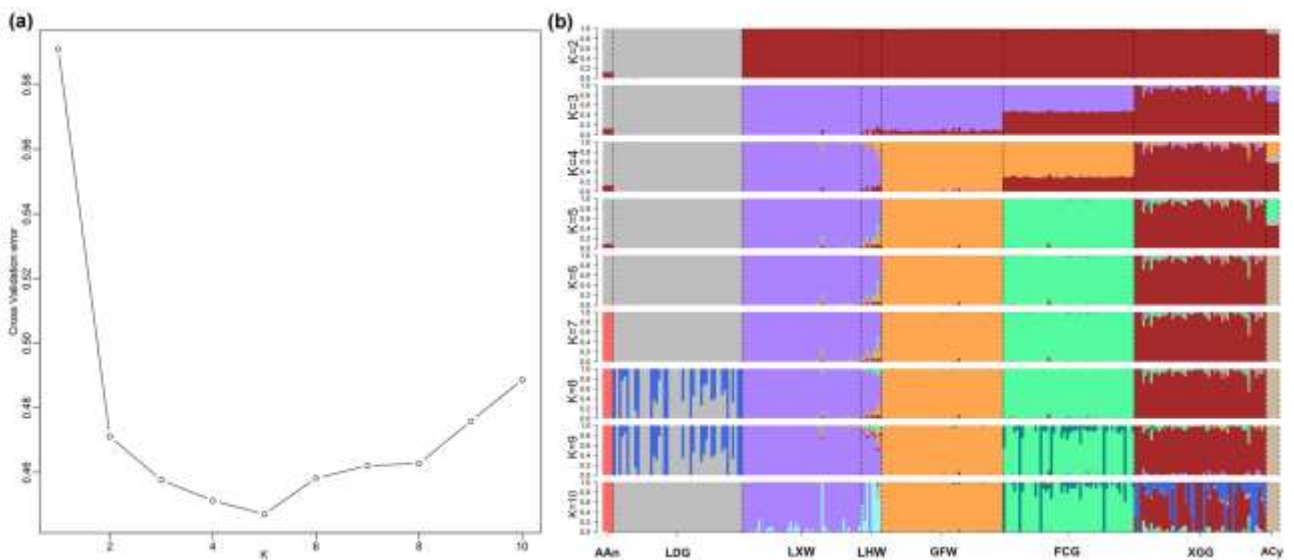

367

368 **Supplementary Figure 8.** Population structure analysis with the maximum likelihood. (a)  
 369 Cross-validation error from  $K = 2$  to  $K = 10$  in ADMIXTURE analysis. (b) Population-structure  
 370 plots with  $K = 2 \sim 10$ .

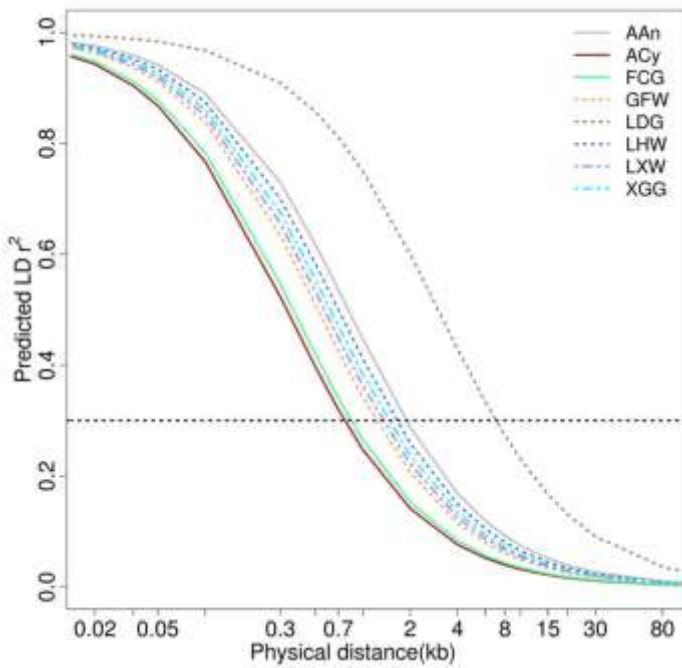

371

372 **Supplementary Figure 9.** Linkage disequilibrium (LD) analysis for six geese breeds and  
 373 two wild species. LD values were estimated using whole-genome sequence data of all  
 374 individuals for each population. The y-axis indicates the physical distance, the ordinate  
 375 indicates the predicted LD( $r^2$ ) value, and the horizontal dashed line indicates the threshold  
 376 line ( $r^2 = 0.3$ ).

377

378

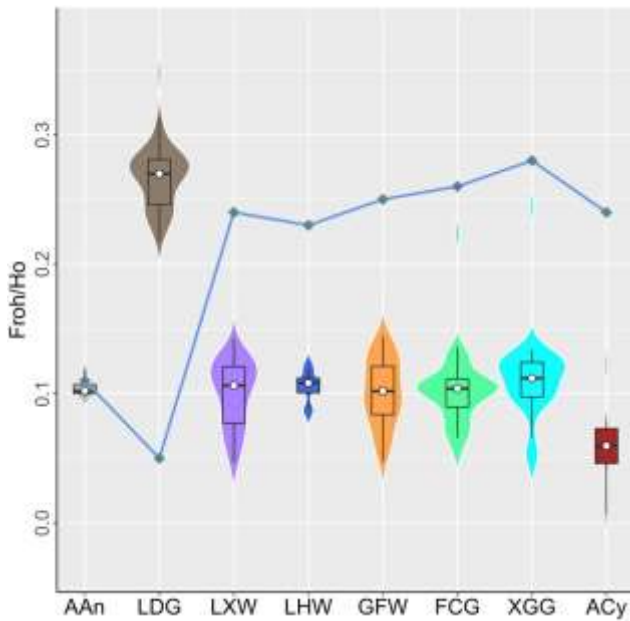

379

380 **Supplementary Figure 10.** The proportion of  $F_{ROH}$  and  $H_o$  for six geese breeds and two  
 381 wild species. The box plot shows the  $F_{ROH}$  values of each population, and the broken line  
 382 shows the  $H_o$ .

383

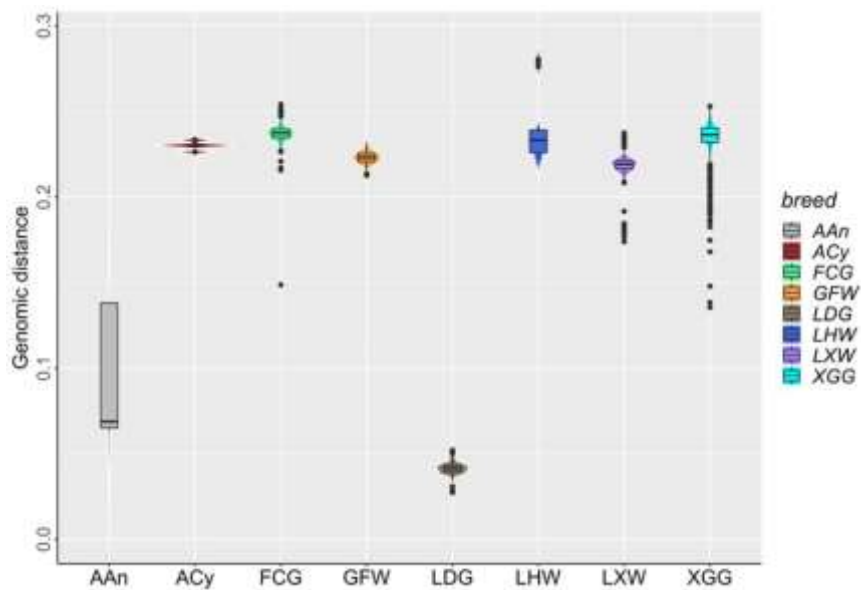

384

385 **Supplementary Figure 11.** The genetic distance (DST) of each population.

386

387

388

389

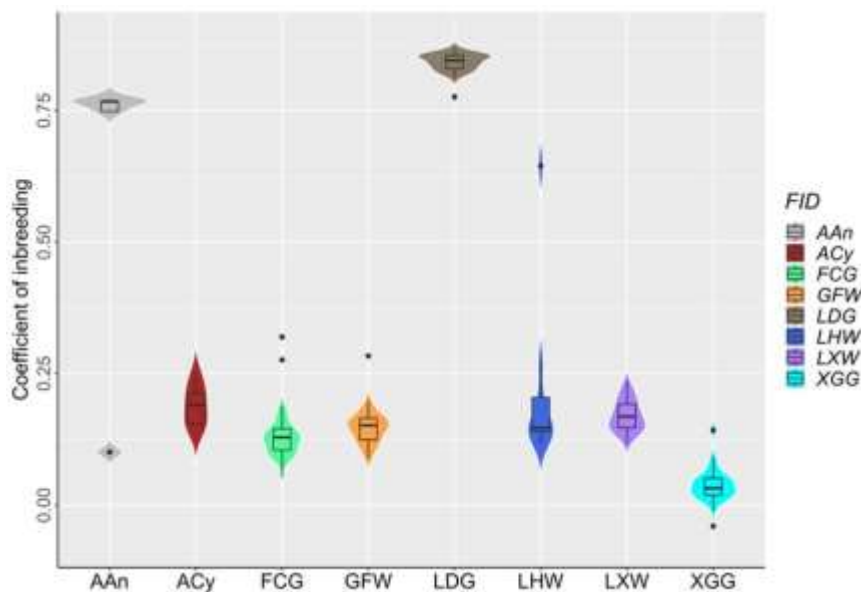

390

391 **Supplementary Figure 12.** The inbreeding coefficient (F) of each population.

392

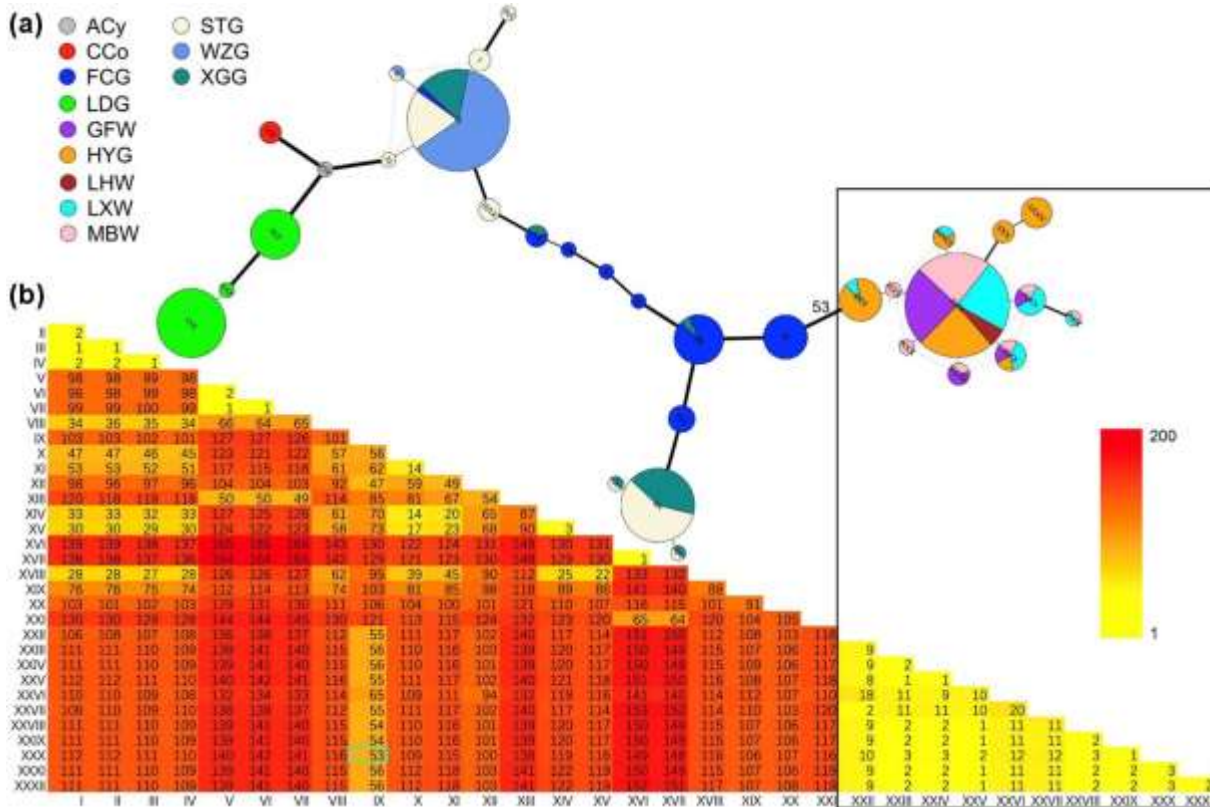

393

394

395

396

397

398

399

400

401

402

**Supplementary Figure 13.** Haplotype network and the difference between 32 haplotypes of 285 variants in *EDNRB2* and *POLR1D* locus. (a) The same haplotype network diagram as Fig. 4d with haplotype ID and the corresponding haplotype differences. (b) The number represents the difference between every two haplotypes, the black box represents the haplotype of white plumage geese, and the cyan box indicates the lowest haplotype difference between gray and white geese.

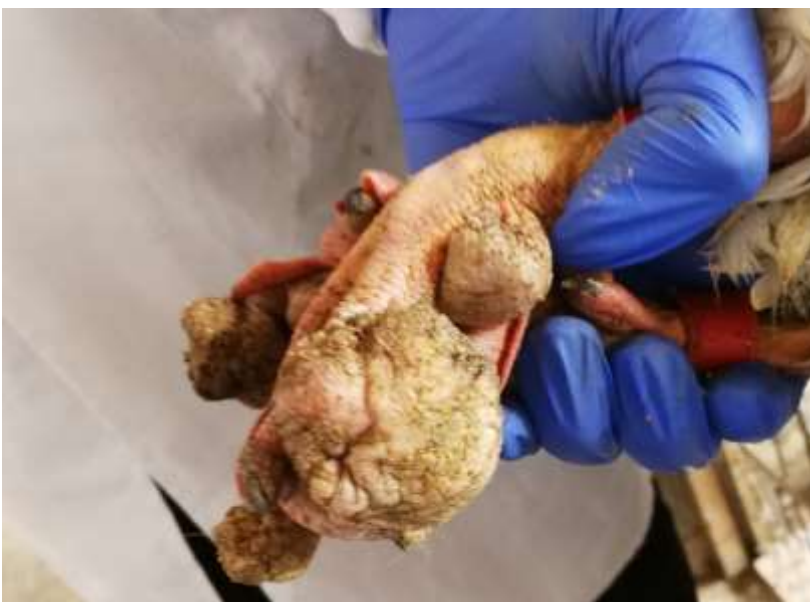

403

404

**Supplementary Figure 14.** Epidermal cysts occur on the feet of XGG population.

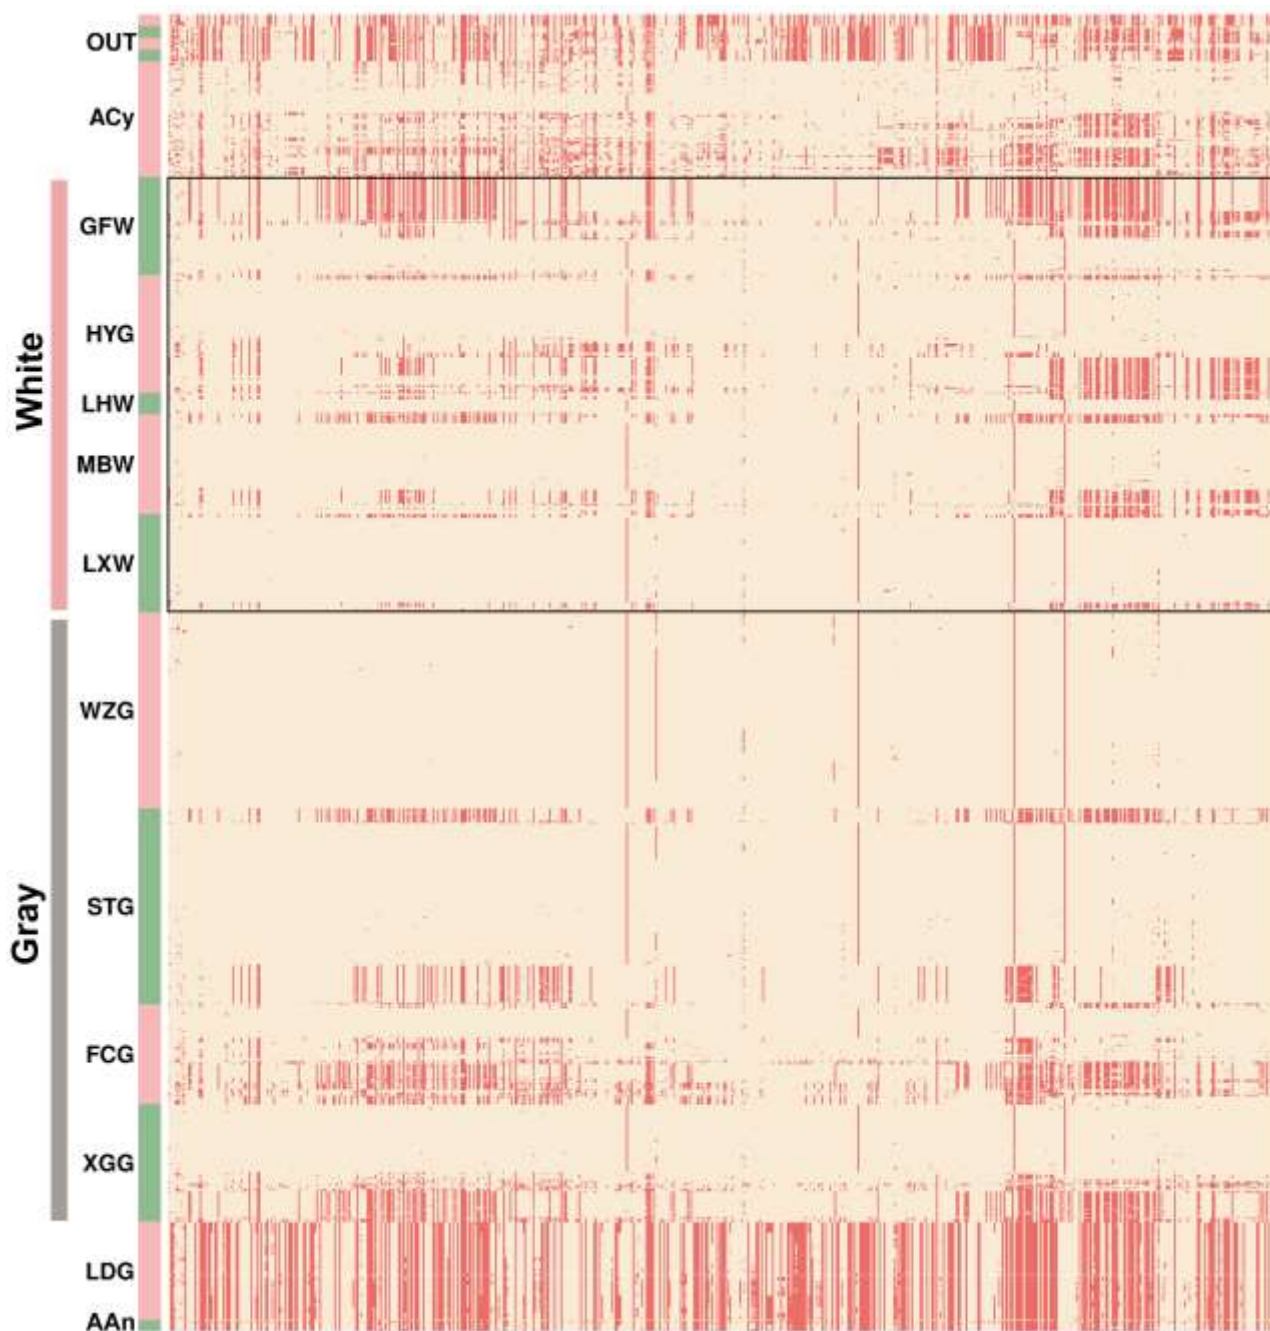

406

407 **Supplementary Figure 15.** Haplotype analysis of *KIT* gene. White represents the Chinese  
 408 white geese, and Gray represents Chinese gray geese. The black box represents the  
 409 haplotypes of the white geese population, and the beige and orange colors represent the  
 410 high and low frequency alleles in the white geese, respectively.

## 411 **Supplementary References**

- 412 1. Ruan, J. & Li, H. Fast and accurate long-read assembly with wtdbg2. *Nat. Methods*  
413 **17**, 155-158 (2020).
- 414 2. Adey, A. et al. In vitro, long-range sequence information for de novo genome  
415 assembly via transposase contiguity. *Genome Res.* **24**, 2041-2049 (2014).
- 416 3. Shelton, J.M. et al. Tools and pipelines for BioNano data: molecule assembly  
417 pipeline and FASTA super scaffolding tool. *BMC Genomics* **16**, 734 (2015).
- 418 4. Li, H. & Durbin, R. Fast and accurate short read alignment with Burrows-Wheeler  
419 transform. *Bioinformatics* **25**, 1754-1760 (2009).
- 420 5. Walker, B.J. et al. Pilon: an integrated tool for comprehensive microbial variant  
421 detection and genome assembly improvement. *PLoS One* **9**, e112963 (2014).
- 422 6. Li, H. et al. The Sequence Alignment/Map format and SAMtools. *Bioinformatics* **25**,  
423 2078-2079 (2009).
- 424 7. Burton, J.N. et al. Chromosome-scale scaffolding of de novo genome assemblies  
425 based on chromatin interactions. *Nat. Biotechnol.* **31**, 1119-1125 (2013).
- 426 8. Parra, G., Bradnam, K. & Korf, I. CEGMA: a pipeline to accurately annotate core  
427 genes in eukaryotic genomes. *Bioinformatics* **23**, 1061-1067 (2007).
- 428 9. Manni, M., Berkeley, M.R., Seppey, M., Simao, F.A. & Zdobnov, E.M. BUSCO  
429 Update: Novel and Streamlined Workflows along with Broader and Deeper  
430 Phylogenetic Coverage for Scoring of Eukaryotic, Prokaryotic, and Viral Genomes.  
431 *Mol. Biol. Evol.* **38**, 4647-4654 (2021).
- 432 10. Camacho, C. et al. BLAST+: architecture and applications. *BMC Bioinformatics* **10**,  
433 421 (2009).
- 434 11. Birney, E., Clamp, M. & Durbin, R. GeneWise and Genomewise. *Genome Res.* **14**,  
435 988-995 (2004).
- 436 12. Levy Karin, E., Mirdita, M. & Soding, J. MetaEuk-sensitive, high-throughput gene  
437 discovery, and annotation for large-scale eukaryotic metagenomics. *Microbiome* **8**,  
438 48 (2020).
- 439 13. Meng, X. & Ji, Y. Modern Computational Techniques for the HMMER Sequence  
440 Analysis. *ISRN. Bioinform.* **2013**, 252183 (2013).
- 441 14. Benson, G. Tandem repeats finder: a program to analyze DNA sequences. *Nucleic  
442 Acids Res.* **27**, 573-580 (1999).
- 443 15. Bao, W., Kojima, K.K. & Kohany, O. Repbase Update, a database of repetitive  
444 elements in eukaryotic genomes. *Mob. DNA* **6**, 11 (2015).
- 445 16. Tarailo-Graovac, M. & Chen, N. Using RepeatMasker to identify repetitive elements  
446 in genomic sequences. *Curr. Protoc. Bioinformatics* **Chapter 4**, Unit 4.10 (2009).
- 447 17. Xu, Z. & Wang, H. LTR\_FINDER: an efficient tool for the prediction of full-length  
448 LTR retrotransposons. *Nucleic Acids Res.* **35**, W265-268 (2007).
- 449 18. Price, A.L., Jones, N.C. & Pevzner, P.A. De novo identification of repeat families in  
450 large genomes. *Bioinformatics* **21 Suppl 1**, i351-358 (2005).
- 451 19. Bao, Z. & Eddy, S.R. Automated de novo identification of repeat sequence families  
452 in sequenced genomes. *Genome Res.* **12**, 1269-1276 (2002).
- 453 20. Edgar, R.C. Search and clustering orders of magnitude faster than BLAST.

- 454 *Bioinformatics* **26**, 2460-2461 (2010).
- 455 21. Birney, E. & Durbin, R. Using GeneWise in the Drosophila annotation experiment.  
456 *Genome Res.* **10**, 547-548 (2000).
- 457 22. Stanke, M., Steinkamp, R., Waack, S. & Morgenstern, B. AUGUSTUS: a web server  
458 for gene finding in eukaryotes. *Nucleic Acids Res.* **32**, W309-W312 (2004).
- 459 23. Parra, G., Blanco, E. & Guigo, R. GeneID in Drosophila. *Genome Res.* **10**, 511-515  
460 (2000).
- 461 24. Burge, C. & Karlin, S. Prediction of complete gene structures in human genomic  
462 DNA. *J. Mol. Biol.* **268**, 78-94 (1997).
- 463 25. Majoros, W.H., Pertea, M. & Salzberg, S.L. TigrScan and GlimmerHMM: two open  
464 source ab initio eukaryotic gene-finders. *Bioinformatics* **20**, 2878-2879 (2004).
- 465 26. Korf, I. Gene finding in novel genomes. *BMC Bioinformatics* **5**, 59 (2004).
- 466 27. Trapnell, C., Pachter, L. & Salzberg, S.L. TopHat: discovering splice junctions with  
467 RNA-Seq. *Bioinformatics* **25**, 1105-1111 (2009).
- 468 28. Trapnell, C. et al. Transcript assembly and quantification by RNA-Seq reveals  
469 unannotated transcripts and isoform switching during cell differentiation. *Nat.*  
470 *Biotechnol.* **28**, 511-515 (2010).
- 471 29. Haas, B.J. et al. Automated eukaryotic gene structure annotation using  
472 EVIDENCEModeler and the Program to Assemble Spliced Alignments. *Genome Biol.*  
473 **9**, R7 (2008).
- 474 30. Altschul, S.F. et al. Gapped BLAST and PSI-BLAST: a new generation of protein  
475 database search programs. *Nucleic Acids Res.* **25**, 3389-3402 (1997).
- 476 31. Bairoch, A. & Apweiler, R. The SWISS-PROT protein sequence data bank and its  
477 supplement TrEMBL in 1999. *Nucleic Acids Res.* **27**, 49-54 (1999).
- 478 32. O'Leary, N.A. et al. Reference sequence (RefSeq) database at NCBI: current  
479 status, taxonomic expansion, and functional annotation. *Nucleic Acids Res.* **44**,  
480 D733-D745 (2016).
- 481 33. Finn, R.D. et al. The Pfam protein families database. *Nucleic Acids Res.* **38**, D211-  
482 D222 (2010).
- 483 34. Du, J. et al. KEGG-PATH: Kyoto encyclopedia of genes and genomes-based  
484 pathway analysis using a path analysis model. *Mol. Biosyst.* **10**, 2441-2447 (2014).
- 485 35. Apweiler, R. et al. The InterPro database, an integrated documentation resource for  
486 protein families, domains and functional sites. *Nucleic Acids Res.* **29**, 37-40 (2001).
- 487 36. Ashburner, M. et al. Gene ontology: tool for the unification of biology. The Gene  
488 Ontology Consortium. *Nat. Genet.* **25**, 25-29 (2000).
- 489 37. Lowe, T.M. & Eddy, S.R. tRNAscan-SE: a program for improved detection of  
490 transfer RNA genes in genomic sequence. *Nucleic Acids Res.* **25**, 955-964 (1997).
- 491 38. Nawrocki, E.P., Kolbe, D.L. & Eddy, S.R. Infernal 1.0: inference of RNA alignments.  
492 *Bioinformatics* **25**, 1335-1337 (2009).
- 493 39. Griffiths-Jones, S. et al. Rfam: annotating non-coding RNAs in complete genomes.  
494 *Nucleic Acids Res.* **33**, D121-D124 (2005).
- 495 40. Li, J. et al. A new duck genome reveals conserved and convergently evolved  
496 chromosome architectures of birds and mammals. *Gigascience* **10**, gaa142 (2021).
- 497 41. Chen, C. et al. TBtools: An Integrative Toolkit Developed for Interactive Analyses of  
498 Big Biological Data. *Mol. Plant.* **13**, 1194-1202 (2020).



- 499 42. Kendig, K.I. et al. Sentieon DNaseSeq Variant Calling Workflow Demonstrates Strong  
500 Computational Performance and Accuracy. *Front. Genet.* **10**, 736 (2019).
- 501 43. McKenna, A. et al. The Genome Analysis Toolkit: a MapReduce framework for  
502 analyzing next-generation DNA sequencing data. *Genome Res.* **20**, 1297-1303  
503 (2010).
- 504 44. Danecek, P. & McCarthy, S.A. BCFtools/csq: haplotype-aware variant  
505 consequences. *Bioinformatics* **33**, 2037-2039 (2017).
- 506 45. Chang, C.C. et al. Second-generation PLINK: rising to the challenge of larger and  
507 richer datasets. *Gigascience* **4**, 7 (2015).
- 508 46. Davies, R.W., Flint, J., Myers, S. & Mott, R. Rapid genotype imputation from  
509 sequence without reference panels. *Nat. Genet.* **48**, 965-969 (2016).
- 510 47. Li, Y. et al. Pacific Biosciences assembly with Hi-C mapping generates an improved,  
511 chromosome-level goose genome. *Gigascience* **9**, 1-8 (2020).
- 512 48. Lu, L. et al. The goose genome sequence leads to insights into the evolution of  
513 waterfowl and susceptibility to fatty liver. *Genome Biol.* **16**, 89 (2015).
- 514 49. Gao, G. et al. Genome and metagenome analyses reveal adaptive evolution of the  
515 host and interaction with the gut microbiota in the goose. *Sci. Rep.* **6**, 32961 (2016).
- 516 50. Wang, W. et al. First de novo whole genome sequencing and assembly of the bar-  
517 headed goose. *PeerJ* **8**, e8914 (2020).
- 518 51. Pujolar, J.M., Dalen, L., Olsen, R.A., Hansen, M.M. & Madsen, J. First de novo  
519 whole genome sequencing and assembly of the pink-footed goose. *Genomics* **110**,  
520 75-79 (2018).
- 521 52. Hillier, L.W. et al. Sequence and comparative analysis of the chicken genome  
522 provide unique perspectives on vertebrate evolution. *Nature* **432**, 695-716 (2004).
- 523 53. Dalloul, R.A. et al. Multi-platform next-generation sequencing of the domestic turkey  
524 (*Meleagris gallopavo*): genome assembly and analysis. *PLoS Biol.* **8**, e1000475  
525 (2010).
- 526 54. Zhang, G.J. et al. Comparative genomics reveals insights into avian genome  
527 evolution and adaptation. *Science* **346**, 1311-1320 (2014).
- 528 55. Colquitt, B.M., Mets, D.G. & Brainard, M.S. Draft genome assembly of the  
529 Bengalese finch, *Lonchura striata domestica*, a model for motor skill variability and  
530 learning. *Gigascience* **7**, 1-6 (2018).
- 531 56. Rhie, A. et al. Towards complete and error-free genome assemblies of all vertebrate  
532 species. *Nature* **592**, 737-746 (2021).
- 533 57. Penalba, J.V. et al. Genome of an iconic Australian bird: High-quality assembly and  
534 linkage map of the superb fairy-wren (*Malurus cyaneus*). *Mol. Ecol. Resour.* **20**,  
535 560-578 (2020).
- 536 58. Leskovec, J. & Sasic, R. SNAP: A General Purpose Network Analysis and Graph  
537 Mining Library. *ACM Trans. Intell. Syst. Technol.* **8**, 1 (2016).
- 538 59. Ghosh, S. & Chan, C.K. Analysis of RNA-Seq Data Using TopHat and Cufflinks.  
539 *Methods Mol. Biol.* **1374**, 339-361 (2016).
- 540 60. Wu, Y. et al. Population genomic data reveal genes related to important traits of  
541 quail. *Gigascience* **7**, giy049 (2018).
- 542 61. Shen, Q.K. et al. Genomic Analyses of Unveil Helmeted Guinea Fowl (*Numida*  
543 *meleagris*) Domestication in West Africa. *Genome Biol. Evol.* **13**, evab090 (2021).

- 544 62. Laine, V.N. et al. Evolutionary signals of selection on cognition from the great tit  
545 genome and methylome. *Nature Communications* **7**, 10474 (2016).
- 546 63. Zhu, F. et al. Three chromosome-level duck genome assemblies provide insights  
547 into genomic variation during domestication. *Nature Communications* **12**, 5932  
548 (2021).
- 549 64. Armstrong, J. et al. Progressive Cactus is a multiple-genome aligner for the  
550 thousand-genome era. *Nature* **587**, 246-251 (2020).
- 551
