# Supplementary material for: Chromosome-level genome and population genomics reveal evolutionary characteristics and conservation status of Chinese indigenous geese
Source: PubMed Central journal article supplement (PMC9640629; doi:10.1038/s42003-022-04125-x), 2022-11-07
Supplement: 42003_2022_4125_MOESM3_ESM.pdf [file 42003_2022_4125_MOESM3_ESM.pdf]

## Description of Additional Supplementary Files

1

2

3 **File name:** Supplementary Data 1

4 **Description:** Positively selected genes identified in XGG genome.

5

6 **File name:** Supplementary Data 2

7 **Description:** Functional categories enrichment of positively selected genes in XGG.

8

9 **File name:** Supplementary Data 3

10 **Description:** Sample information for whole genome resequencing.

11

12
